# Supplementary material
Source: publisher figshare collection journal article supplement (https://wiley.figshare.com/ndownloader/files/33559895)
Supplement: Supplementary file 1 [file 33559895]

## Sheet: Algal concentrations
Experiment	Treatment	Vessel	Replicates	Water column mixed before sampling?	Test condition	day	cells/mL Replicate 1	cells/mL Replicate 2	cells/mL Replicate 3	cells/mL Replicate 4	cells/mL Replicate 5	cells/mL Replicate 6	cells/mL Replicate 7	cells/mL Replicate 8	average	std dev	std error	95% C.I (=std.error*z(n-f))	average*10^4	std dev *10^4	95%C.I * 10^4
experiment 1	T1	Dish	3	yes	T82MV, 65 rpm, 25 ± 1°C, 12/12h light/dark, ca. 16 par	0	115309	111045	118355						114903	3671.69	2119.85	9121.72	11.4903	0.367169	0.912172
experiment 1	T1	Dish	3	yes	T82MV, 65 rpm, 25 ± 1°C, 12/12h light/dark, ca. 16 par	1	159776	108406	96629.1						121604	33578.6	19386.6	83420.7	12.1604	3.35786	8.34207
experiment 1	T1	Dish	3	yes	T82MV, 65 rpm, 25 ± 1°C, 12/12h light/dark, ca. 16 par	2	339268	403024	531552						424614	97943.1	56547.5	243324	42.4614	9.79431	24.3324
experiment 1	T1	Dish	3	yes	T82MV, 65 rpm, 25 ± 1°C, 12/12h light/dark, ca. 16 par	3
experiment 1	T1	Dish	3	yes	T82MV, 65 rpm, 25 ± 1°C, 12/12h light/dark, ca. 16 par	4	336628	83025.1	166071						195241	129294	74647.7	321209	19.5241	12.9294	32.1209
experiment 1	T2	Dish	3	yes	T82MV, 150 rpm, 23 ± 1°C, 24h light, 60 – 80 par	0	82416	88507.3	93177.4						88033.5	5396.31	3115.56	13406.3	8.80335	0.539631	1.34063
experiment 1	T2	Dish	3	yes	T82MV, 150 rpm, 23 ± 1°C, 24h light, 60 – 80 par	1	68812	107594	127289						101231	29753.1	17177.9	73916.7	10.1231	2.97531	7.39167
experiment 1	T2	Dish	3	yes	T82MV, 150 rpm, 23 ± 1°C, 24h light, 60 – 80 par	2	105969	40994.8	32873						59945.7	40063.9	23130.9	99532.2	5.99457	4.00639	9.95322
experiment 1	T2	Dish	3	yes	T82MV, 150 rpm, 23 ± 1°C, 24h light, 60 – 80 par	3
experiment 1	T2	Dish	3	yes	T82MV, 150 rpm, 23 ± 1°C, 24h light, 60 – 80 par	4	756119	545359	869012						723497	164274	94843.9	408113	72.3497	16.4274	40.8113
experiment 1	T3	Flask	3	yes	T82MV, 65 rpm, 25 ± 1°C, 12/12h light/dark, ca. 16 par	0	108406	104954	105157						106172	1936.93	1118.28	4811.98	10.6172	0.193693	0.481198
experiment 1	T3	Flask	3	yes	T82MV, 65 rpm, 25 ± 1°C, 12/12h light/dark, ca. 16 par	1	118558	130335	110842						119912	9816.41	5667.51	24387.3	11.9912	0.981641	2.43873
experiment 1	T3	Flask	3	yes	T82MV, 65 rpm, 25 ± 1°C, 12/12h light/dark, ca. 16 par	2	216223	225766	206273						216087	9746.86	5627.36	24214.5	21.6087	0.974686	2.42145
experiment 1	T3	Flask	3	yes	T82MV, 65 rpm, 25 ± 1°C, 12/12h light/dark, ca. 16 par	3
experiment 1	T3	Flask	3	yes	T82MV, 65 rpm, 25 ± 1°C, 12/12h light/dark, ca. 16 par	4	208304	193279	240994						214192	24396.7	14085.4	60609.6	21.4192	2.43967	6.06096
experiment 1	T4	Flask	3	yes	T82MV, 150 rpm, 23 ± 1°C, 24h light, 60 – 80 par	0	119370	97238.3	119573						112061	12836.9	7411.37	31891.1	11.2061	1.28369	3.18911
experiment 1	T4	Flask	3	yes	T82MV, 150 rpm, 23 ± 1°C, 24h light, 60 – 80 par	1	247695	162619	201400						203905	42593.2	24591.2	105816	20.3905	4.25932	10.5816
experiment 1	T4	Flask	3	yes	T82MV, 150 rpm, 23 ± 1°C, 24h light, 60 – 80 par	2	1.53967e+06	1.27551e+06	1.6217e+06						1.47896e+06	180905	104445	449428	147.896	18.0905	44.9428
experiment 1	T4	Flask	3	yes	T82MV, 150 rpm, 23 ± 1°C, 24h light, 60 – 80 par	3
experiment 1	T4	Flask	3	yes	T82MV, 150 rpm, 23 ± 1°C, 24h light, 60 – 80 par	4	7.67813e+06	7.39752e+06	7.13437e+06						7.40334e+06	271924	156995	675551	740.334	27.1924	67.5551
experiment 1	T5	Dish	3	yes	OECD med., 65 rpm, 25 ± 1°C, 12/12h light/dark, 16 par	0	113127	114101	115855						114361	1382.35	798.098	3434.22	11.4361	0.138235	0.343422
experiment 1	T5	Dish	3	yes	OECD med., 65 rpm, 25 ± 1°C, 12/12h light/dark, 16 par	1	157357	145471	146251						149693	6648.57	3838.55	16517.3	14.9693	0.664857	1.65173
experiment 1	T5	Dish	3	yes	OECD med., 65 rpm, 25 ± 1°C, 12/12h light/dark, 16 par	2	1.456e+06	1.58167e+06	1.82776e+06						1.62181e+06	189104	109179	469799	162.181	18.9104	46.9799
experiment 1	T5	Dish	3	yes	OECD med., 65 rpm, 25 ± 1°C, 12/12h light/dark, 16 par	3
experiment 1	T5	Dish	3	yes	OECD med., 65 rpm, 25 ± 1°C, 12/12h light/dark, 16 par	4	442025	546657	456444						481709	56707	32739.8	140879	48.1709	5.6707	14.0879
experiment 1	T6	Dish	3	yes	OECD med., 150 rpm, 23 ± 1°C, 24h light, 60 – 80 par	0	133975	94421.9	103385						110594	20738.9	11973.6	51522.4	11.0594	2.07389	5.15224
experiment 1	T6	Dish	3	yes	OECD med., 150 rpm, 23 ± 1°C, 24h light, 60 – 80 par	1	323170	337394	341485						334016	9613.45	5550.33	23883.1	33.4016	0.961345	2.38831
experiment 1	T6	Dish	3	yes	OECD med., 150 rpm, 23 ± 1°C, 24h light, 60 – 80 par	2	296281	300763	255559						284201	24905.9	14379.4	61874.6	28.4201	2.49059	6.18746
experiment 1	T6	Dish	3	yes	OECD med., 150 rpm, 23 ± 1°C, 24h light, 60 – 80 par	3
experiment 1	T6	Dish	3	yes	OECD med., 150 rpm, 23 ± 1°C, 24h light, 60 – 80 par	4	2.58746e+06	2.68644e+06	2.77101e+06						2.68164e+06	91866.3	53039.1	228227	268.164	9.18663	22.8227
experiment 1	T7	Flask	3	yes	OECD med., 65 rpm, 25 ± 1°C, 12/12h light/dark, 16 par	0	132417	103190	126571						120726	15465.3	8928.92	38421.1	12.0726	1.54653	3.84211
experiment 1	T7	Flask	3	yes	OECD med., 65 rpm, 25 ± 1°C, 12/12h light/dark, 16 par	1	153265	148589	169437						157097	10939.7	6316.04	27177.9	15.7097	1.09397	2.71779
experiment 1	T7	Flask	3	yes	OECD med., 65 rpm, 25 ± 1°C, 12/12h light/dark, 16 par	2	260040	276797	268808						268548	8381.36	4838.98	20822.1	26.8548	0.838136	2.08221
experiment 1	T7	Flask	3	yes	OECD med., 65 rpm, 25 ± 1°C, 12/12h light/dark, 16 par	3
experiment 1	T7	Flask	3	yes	OECD med., 65 rpm, 25 ± 1°C, 12/12h light/dark, 16 par	4	517625	548216	540422						535421	15896.7	9177.96	39492.8	53.5421	1.58967	3.94928
experiment 1	T8	Flask	3	yes	OECD med., 150 rpm, 23 ± 1°C, 24h light, 60 – 80 par	0	119947	113517	120141						117868	3769.8	2176.5	9365.46	11.7868	0.37698	0.936546
experiment 1	T8	Flask	3	yes	OECD med., 150 rpm, 23 ± 1°C, 24h light, 60 – 80 par	1	383572	370517	381039						378376	6922.71	3996.83	17198.4	37.8376	0.692271	1.71984
experiment 1	T8	Flask	3	yes	OECD med., 150 rpm, 23 ± 1°C, 24h light, 60 – 80 par	2	2.12743e+06	2.41113e+06	2.33163e+06						2.29007e+06	146344	84491.6	363567	229.007	14.6344	36.3567
experiment 1	T8	Flask	3	yes	OECD med., 150 rpm, 23 ± 1°C, 24h light, 60 – 80 par	3
experiment 1	T8	Flask	3	yes	OECD med., 150 rpm, 23 ± 1°C, 24h light, 60 – 80 par	4	9.64962e+06	1.00313e+07	9.00546e+06						9.56214e+06	518495	299353	1.28812e+06	956.214	51.8495	128.812
experiment 10	T1	Dish	3	no	Inoculation 2 x 104 cells/mL algae	0	88493.5	82144.7	96991.3						89209.8	6082.22	3511.57	15110.3	8.92098	0.608222	1.51103
experiment 10	T1	Dish	3	no	Inoculation 2 x 104 cells/mL algae	1	54307.3	9279.12	8204.7						23930.4	21484.2	12403.9	53374	2.39304	2.14842	5.3374
experiment 10	T1	Dish	3	no	Inoculation 2 x 104 cells/mL algae	2	13772.2	2051.18	1855.83						5893.06	5571.95	3216.97	13842.6	0.589306	0.557195	1.38426
experiment 10	T1	Dish	3	no	Inoculation 2 x 104 cells/mL algae	3	23539.7	1953.5	3711.65						9734.94	9787.77	5650.97	24316.1	0.973494	0.978777	2.43161
experiment 10	T1	Dish	3	no	Inoculation 2 x 104 cells/mL algae	4
experiment 10	T1	Dish	3	no	Inoculation 2 x 104 cells/mL algae	5	34967.7	10158.2	2539.55						15888.5	13844.9	7993.36	34395.4	1.58885	1.38449	3.43954
experiment 10	T2	Dish	3	no	Inoculation 5 x 104 cells/mL algae	0	213518	224555	215373						217815	4825.45	2785.97	11988	21.7815	0.482545	1.1988
experiment 10	T2	Dish	3	no	Inoculation 5 x 104 cells/mL algae	1	54991	33795.5	33404.8						40730.5	10085	5822.57	25054.5	4.07305	1.0085	2.50545
experiment 10	T2	Dish	3	no	Inoculation 5 x 104 cells/mL algae	2	31939.7	39558.4	28911.8						33470	4479.11	2586.01	11127.6	3.347	0.447911	1.11276
experiment 10	T2	Dish	3	no	Inoculation 5 x 104 cells/mL algae	3	50498	56065.4	49814.2						52125.9	2799.64	1616.37	6955.25	5.21259	0.279964	0.695525
experiment 10	T2	Dish	3	no	Inoculation 5 x 104 cells/mL algae	4
experiment 10	T2	Dish	3	no	Inoculation 5 x 104 cells/mL algae	5	94354.1	116331	92888.9						101191	10722	6190.37	26637.1	10.1191	1.0722	2.66371
experiment 10	T3	Dish	3	no	Inoculation 10 x 104 cells/mL algae	0	449696	446082	437486						444421	5120.88	2956.54	12722	44.4421	0.512088	1.2722
experiment 10	T3	Dish	3	no	Inoculation 10 x 104 cells/mL algae	1	68177.1	56846.9	70814.4						65279.5	6059.17	3498.27	15053	6.52795	0.605917	1.5053
experiment 10	T3	Dish	3	no	Inoculation 10 x 104 cells/mL algae	2	75405.1	81265.6	70912.1						75860.9	4239.09	2447.44	10531.3	7.58609	0.423909	1.05313
experiment 10	T3	Dish	3	no	Inoculation 10 x 104 cells/mL algae	3	129517	152959	121898						134792	13217.6	7631.16	32836.9	13.4792	1.32176	3.28369
experiment 10	T3	Dish	3	no	Inoculation 10 x 104 cells/mL algae	4
experiment 10	T3	Dish	3	no	Inoculation 10 x 104 cells/mL algae	5	231392	315588	231392						259457	39690.3	22915.2	98604.1	25.9457	3.96903	9.86041
experiment 10	T4	Dish	3	no	Inoculation 20 x 104 cells/mL algae	0	816465	823205	886694						842121	31637.3	18265.8	78597.7	84.2121	3.16373	7.85977
experiment 10	T4	Dish	3	no	Inoculation 20 x 104 cells/mL algae	1	123950	130787	167024						140587	18901.3	10912.7	46957.2	14.0587	1.89013	4.69572
experiment 10	T4	Dish	3	no	Inoculation 20 x 104 cells/mL algae	2	223187	221722	172787						205899	23421.2	13522.3	58186.3	20.5899	2.34212	5.81863
experiment 10	T4	Dish	3	no	Inoculation 20 x 104 cells/mL algae	3	372728	381421	299179						351109	36891.5	21299.3	91651.1	35.1109	3.68915	9.16511
experiment 10	T4	Dish	3	no	Inoculation 20 x 104 cells/mL algae	4
experiment 10	T4	Dish	3	no	Inoculation 20 x 104 cells/mL algae	5	660185	689683	505663						618511	80698.6	46591.4	200483	61.8511	8.06986	20.0483
experiment 11	T1	Dish	3	no	Inoculation 2 x 104 cells/mL algae	0	376052	332106	330223						346127	21174.2	12224.9	52603.9	34.6127	2.11742	5.26039
experiment 11	T1	Dish	3	no	Inoculation 2 x 104 cells/mL algae	1	515424	72824.8	81614						223288	206603	119282	513271	22.3288	20.6603	51.3271
experiment 11	T1	Dish	3	no	Inoculation 2 x 104 cells/mL algae	2
experiment 11	T1	Dish	3	no	Inoculation 2 x 104 cells/mL algae	3	87892	93542.2	87264.2						89566.1	2823.16	1629.95	7013.69	8.95661	0.282316	0.701369
experiment 11	T1	Dish	3	no	Inoculation 2 x 104 cells/mL algae	4	94170	131210	95425.6						106935	17172.6	9914.62	42662.6	10.6935	1.71726	4.26626
experiment 11	T2	Dish	3	no	Inoculation 10 x 104 cells/mL algae	0	1.45712e+06	1.41318e+06	1.38618e+06						1418828	29236	16879.4	72632.1	141.883	2.9236	7.26321
experiment 11	T2	Dish	3	no	Inoculation 10 x 104 cells/mL algae	1	241703	217219	243586						234169	12010.5	6934.28	29838.2	23.4169	1.20105	2.98382
experiment 11	T2	Dish	3	no	Inoculation 10 x 104 cells/mL algae	2
experiment 11	T2	Dish	3	no	Inoculation 10 x 104 cells/mL algae	3	619639	592643	710670						640984	50492.7	29152	125441	64.0984	5.04927	12.5441
experiment 11	T2	Dish	3	no	Inoculation 10 x 104 cells/mL algae	4	815512	747082	713181						758592	42562	24573.2	105738	75.8592	4.2562	10.5738
experiment 11	T3	Dish	3	no	Inoculation 20 x 104 cells/mL algae	0	2.67192e+06	2.72214e+06	2.95631e+06						2.78346e+06	123934	71553.5	307895	278.346	12.3934	30.7895
experiment 11	T3	Dish	3	no	Inoculation 20 x 104 cells/mL algae	1	1.69883e+06	1.82439e+06	1.66869e+06						1.73064e+06	67424.1	38927.4	167504	173.064	6.74241	16.7504
experiment 11	T3	Dish	3	no	Inoculation 20 x 104 cells/mL algae	2
experiment 11	T3	Dish	3	no	Inoculation 20 x 104 cells/mL algae	3	3.88797e+06	4090117	4.27155e+06						4.08321e+06	156674	90456	389232	408.321	15.6674	38.9232
experiment 11	T3	Dish	3	no	Inoculation 20 x 104 cells/mL algae	4	4.39523e+06	4.72671e+06	4.89119e+06						4.67104e+06	206266	119088	512435	467.104	20.6266	51.2435
experiment 12	T1	Dish	3	no	Regular metal concentration, 0.05 ml/L	0	107405	106957	101475						105279	2695.98	1556.52	6697.71	10.5279	0.269598	0.669771
experiment 12	T1	Dish	3	no	Regular metal concentration, 0.05 ml/L	1	5705.88	4810.84	4027.68						4848.13	685.63	395.848	1703.34	0.484813	0.068563	0.170334
experiment 12	T1	Dish	3	no	Regular metal concentration, 0.05 ml/L	3	0	895.04	0						298.347	421.926	243.599	1048.21	0.0298347	0.0421926	0.104821
experiment 12	T1	Dish	3	no	Regular metal concentration, 0.05 ml/L	5	10069.2	14768.2	6824.68						10554	3260.98	1882.73	8101.38	1.0554	0.326098	0.810138
experiment 12	T2	Dish	3	no	Twofold metal concentration, 0.10 ml/L	0	108412	106174	114565						109717	3547.77	2048.31	8813.86	10.9717	0.354777	0.881386
experiment 12	T2	Dish	3	no	Twofold metal concentration, 0.10 ml/L	1	4698.96	13313.7	4251.44						7421.37	4170.52	2407.85	10361	0.742137	0.417052	1.0361
experiment 12	T2	Dish	3	no	Twofold metal concentration, 0.10 ml/L	3	9733.56	1230.68	2573.24						4512.49	3732.32	2154.85	9272.33	0.451249	0.373232	0.927233
experiment 12	T2	Dish	3	no	Twofold metal concentration, 0.10 ml/L	5	19690.9	11971.2	12083						14581.7	3613.03	2085.98	8975.99	1.45817	0.361303	0.897599
experiment 13	T1	Dish	1	no	Trace metals with dinitrolo EDTA	0	67874.8	83983.3							75929.1	8054.23	5695.2	72363.2	7.59291	0.805423	7.23632
experiment 13	T1	Dish	1	no	Trace metals with dinitrolo EDTA	1	41004.9	37344.6							39174.8	1830.12	1294.09	16442.7	3.91748	0.183012	1.64427
experiment 13	T1	Dish	1	no	Trace metals with dinitrolo EDTA	2	40245.9	32942.2							36594	3651.81	2582.22	32809.7	3.6594	0.365181	3.28097
experiment 13	T1	Dish	1	no	Trace metals with dinitrolo EDTA	3
experiment 13	T1	Dish	1	no	Trace metals with dinitrolo EDTA	4	83325.4	79311							81318.2	2007.23	1419.33	18034	8.13182	0.200723	1.8034
experiment 13	T1	Dish	1	no	Trace metals with dinitrolo EDTA	5	169097	177649							173373	4275.91	3023.53	38416.9	17.3373	0.427591	3.84169
experiment 13	T2	Dish	1	no	Trace metals with disodium EDTA	0	71720.6	70438.7							71079.6	640.965	453.231	5758.75	7.10796	0.0640965	0.575875
experiment 13	T2	Dish	1	no	Trace metals with disodium EDTA	1	33886.8	22366.3							28126.6	5760.25	4073.11	51753	2.81266	0.576025	5.1753
experiment 13	T2	Dish	1	no	Trace metals with disodium EDTA	2	23884.4	18419.3							21151.8	2732.53	1932.19	24550.5	2.11518	0.273253	2.45505
experiment 13	T2	Dish	1	no	Trace metals with disodium EDTA	3
experiment 13	T2	Dish	1	no	Trace metals with disodium EDTA	4	63253.1	124550							93901.4	30648.2	21671.6	275359	9.39014	3.06482	27.5359
experiment 13	T2	Dish	1	no	Trace metals with disodium EDTA	5	125579	185526							155552	29973.5	21194.5	269297	15.5552	2.99735	26.9297
experiment 13	T3	Dish	1	no	Trace metals with tetrasodium EDTA	0	74351.9	68566.4							71459.2	2892.78	2045.5	25990.1	7.14592	0.289278	2.59901
experiment 13	T3	Dish	1	no	Trace metals with tetrasodium EDTA	1	41578.4	39790.4							40684.4	893.978	632.138	8031.94	4.06844	0.0893978	0.803194
experiment 13	T3	Dish	1	no	Trace metals with tetrasodium EDTA	2	38879.6	35101.3							36990.4	1889.16	1335.84	16973.2	3.69904	0.188916	1.69732
experiment 13	T3	Dish	1	no	Trace metals with tetrasodium EDTA	3
experiment 13	T3	Dish	1	no	Trace metals with tetrasodium EDTA	4	80997.7	103145							92071.2	11073.5	7830.16	33693.2	9.20712	1.10735	3.36932
experiment 13	T3	Dish	1	no	Trace metals with tetrasodium EDTA	5	129795	153342							141569	11773.5	8325.13	35823	14.1569	1.17735	3.5823
experiment 14	T1	Dish	3	no	Inoculation 2 x 104 cells/mL algae	0	261212	275987	258045						265081	7819.15	4514.39	19425.4	26.5081	0.781915	1.94254
experiment 14	T1	Dish	3	no	Inoculation 2 x 104 cells/mL algae	1	24484.2	21345.2	552464						199431	249635	144127	620178	19.9431	24.9635	62.0178
experiment 14	T1	Dish	3	no	Inoculation 2 x 104 cells/mL algae	2
experiment 14	T1	Dish	3	no	Inoculation 2 x 104 cells/mL algae	3	57757.6	2.26259e+06	55246.4						791865	1.03996e+06	600422	2.58361e+06	79.1865	103.996	258.361
experiment 14	T1	Dish	3	no	Inoculation 2 x 104 cells/mL algae	4	55874.2	56502	62780						58385.4	3118	1800.18	7746.17	5.83854	0.3118	0.774617
experiment 14	T2	Dish	3	no	Inoculation 10 x 104 cells/mL algae	0	1428245	1.28762e+06	1.41757e+06						1.37781e+06	63925.4	36907.3	158812	137.781	6.39254	15.8812
experiment 14	T2	Dish	3	no	Inoculation 10 x 104 cells/mL algae	1	305739	482150	232914						340268	104639	60413.2	259958	34.0268	10.4639	25.9958
experiment 14	T2	Dish	3	no	Inoculation 10 x 104 cells/mL algae	2
experiment 14	T2	Dish	3	no	Inoculation 10 x 104 cells/mL algae	3	594527	661073	529235						594945	53823.5	31075	133716	59.4945	5.38235	13.3716
experiment 14	T2	Dish	3	no	Inoculation 10 x 104 cells/mL algae	4	762149	907799	638473						769474	110074	63551.2	273461	76.9474	11.0074	27.3461
experiment 14	T3	Dish	3	no	Inoculation 20 x 104 cells/mL algae	0	2.66376e+06	2.68636e+06	2.49613e+06						2.61541e+06	84848.3	48987.2	210792	261.541	8.48483	21.0792
experiment 14	T3	Dish	3	no	Inoculation 20 x 104 cells/mL algae	1	1246183	1.29452e+06	1.45775e+06						1.33282e+06	90517.9	52260.6	224877	133.282	9.05179	22.4877
experiment 14	T3	Dish	3	no	Inoculation 20 x 104 cells/mL algae	2
experiment 14	T3	Dish	3	no	Inoculation 20 x 104 cells/mL algae	3	3.38259e+06	3.09757e+06	3945723						3.47529e+06	352409	203464	875504	347.529	35.2409	87.5504
experiment 14	T3	Dish	3	no	Inoculation 20 x 104 cells/mL algae	4	4.20563e+06	3.79442e+06	4.91191e+06						4.30399e+06	461482	266437	1.14648e+06	430.399	46.1482	114.648
experiment 15	Not shown	Flask	3	no	0.23 g/L Na2SiO3	0	96938.6	96938.6	96938.6						96938.6	1.45519e-11	8.40155e-12	3.61519e-11	9.69386	1.45519e-15	3.61519e-15
experiment 15	Not shown	Flask	3	no	0.23 g/L Na2SiO3	1	70313.8	72492.2	77272.5						73359.5	2906.35	1677.98	7220.35	7.33595	0.290635	0.722035
experiment 15	Not shown	Flask	3	no	0.23 g/L Na2SiO3	2	45080.7	51192.3	43446.9						46573.3	3333.54	1924.62	8281.64	4.65733	0.333354	0.828164
experiment 15	Not shown	Flask	3	no	0.23 g/L Na2SiO3	3
experiment 15	Not shown	Flask	3	no	0.23 g/L Na2SiO3	4	0	0	0						0	0	0	0	0	0	0
experiment 15	Not shown	Flask	3	no	0.23 g/L Na2SiO3	5
experiment 15	Not shown	Flask	3	no	0.23 g/L Na2SiO3	6	75638.8	80540.1	62931.4						73036.8	7420.44	4284.19	18434.9	7.30368	0.742044	1.84349
experiment 15	Not shown	Flask	3	yes	0.23 g/L Na2SiO3	0	96938.6	96938.6	96938.6						96938.6	1.45519e-11	8.40155e-12	3.61519e-11	9.69386	1.45519e-15	3.61519e-15
experiment 15	Not shown	Flask	3	yes	0.23 g/L Na2SiO3	1
experiment 15	Not shown	Flask	3	yes	0.23 g/L Na2SiO3	2	155755	93792.1	155029						134859	29040.1	16766.3	72145.5	13.4859	2.90401	7.21455
experiment 15	Not shown	Flask	3	yes	0.23 g/L Na2SiO3	3
experiment 15	Not shown	Flask	3	yes	0.23 g/L Na2SiO3	4	317017	358467	278109						317864	32811.7	18943.9	81515.4	31.7864	3.28117	8.15154
experiment 15	Not shown	Flask	3	yes	0.23 g/L Na2SiO3	5
experiment 15	Not shown	Flask	3	yes	0.23 g/L Na2SiO3	6	747069	516461	649888						637806	94531.9	54578	234849	63.7806	9.45319	23.4849
experiment 15	Not shown	Flask	3		mixed-unmixed	0	0	0	0						0	0	0	0	0	0	0
experiment 15	Not shown	Flask	3		mixed-unmixed	1	0	0	0						0	0	0	0	0	0	0
experiment 15	Not shown	Flask	3		mixed-unmixed	2	110675	42599.7	111582						88285.5	32306.9	18652.4	80261.2	8.82855	3.23069	8.02612
experiment 15	Not shown	Flask	3		mixed-unmixed	3
experiment 15	Not shown	Flask	3		mixed-unmixed	4	317017	358467	278109						317864	32811.7	18943.9	81515.4	31.7864	3.28117	8.15154
experiment 15	Not shown	Flask	3		mixed-unmixed	5
experiment 15	Not shown	Flask	3		mixed-unmixed	6	671430	435921	586957						564769	97417.7	56244.1	242018	56.4769	9.74177	24.2018
experiment 15	T1	Dish	3	no	0.23 g/L Na2SiO3	0	85320.5	85320.5	85320.5						85320.5	0	0	0	8.53205	0	0
experiment 15	T1	Dish	3	no	0.23 g/L Na2SiO3	1	42236.7	47622.2	45988.4						45282.4	2254.57	1301.68	5601.12	4.52824	0.225457	0.560112
experiment 15	T1	Dish	3	no	0.23 g/L Na2SiO3	2	19061	26866.9	18153.3						21360.4	3911.28	2258.18	9716.93	2.13604	0.391128	0.971693
experiment 15	T1	Dish	3	no	0.23 g/L Na2SiO3	3
experiment 15	T1	Dish	3	no	0.23 g/L Na2SiO3	4	12888.8	18818.9	10226.4						13978	3591.45	2073.53	8922.38	1.3978	0.359145	0.892238
experiment 15	T1	Dish	3	no	0.23 g/L Na2SiO3	5
experiment 15	T1	Dish	3	no	0.23 g/L Na2SiO3	6	30316	58695.7	42236.7						43749.5	11635.2	6717.6	28905.8	4.37495	1.16352	2.89058
experiment 15	T1	Dish	3	yes	0.23 g/L Na2SiO3	0	85320.5	85320.5	85320.5						85320.5	0	0	0	8.53205	0	0
experiment 15	T1	Dish	3	yes	0.23 g/L Na2SiO3	1
experiment 15	T1	Dish	3	yes	0.23 g/L Na2SiO3	2	66683.1	98390.9	74368						79814	13505.3	7797.29	33551.7	7.9814	1.35053	3.35517
experiment 15	T1	Dish	3	yes	0.23 g/L Na2SiO3	3
experiment 15	T1	Dish	3	yes	0.23 g/L Na2SiO3	4	199565	232786	195935						209429	16582.4	9573.88	41196.4	20.9429	1.65824	4.11964
experiment 15	T1	Dish	3	yes	0.23 g/L Na2SiO3	5
experiment 15	T1	Dish	3	yes	0.23 g/L Na2SiO3	6	474043	552163	495464						507223	32958.4	19028.5	81879.8	50.7223	3.29584	8.18798
experiment 15	T1	Dish	3		mixed-unmixed	0	0	0	0						0	0	0	0	0	0	0
experiment 15	T1	Dish	3		mixed-unmixed	1	0	0	0						0	0	0	0	0	0	0
experiment 15	T1	Dish	3		mixed-unmixed	2	47622.2	71524	56214.7						58453.6	9885.48	5707.38	24558.9	5.84536	0.988548	2.45589
experiment 15	T1	Dish	3		mixed-unmixed	3
experiment 15	T1	Dish	3		mixed-unmixed	4	186676	213967	185708						195451	13099	7562.72	32542.4	19.5451	1.3099	3.25424
experiment 15	T1	Dish	3		mixed-unmixed	5
experiment 15	T1	Dish	3		mixed-unmixed	6	443727	493467	453227						463474	21560.2	12447.8	53562.8	46.3474	2.15602	5.35628
experiment 16	T1	Dish	3	no	0.23 g/L Na2SiO3, pH adjustment with HCl	0	89798.3	81931.9	87317.4						86349.2	3283.62	1895.8	8157.61	8.63492	0.328362	0.815761
experiment 16	T1	Dish	3	no	0.23 g/L Na2SiO3, pH adjustment with HCl	1	195027	197508	191638						194724	2405.77	1388.97	5976.75	19.4724	0.240577	0.597675
experiment 16	T1	Dish	3	no	0.23 g/L Na2SiO3, pH adjustment with HCl	2	413593	440036	394955						416195	18495.9	10678.6	45950	41.6195	1.84959	4.595
experiment 16	T1	Dish	3	no	0.23 g/L Na2SiO3, pH adjustment with HCl	3
experiment 16	T1	Dish	3	no	0.23 g/L Na2SiO3, pH adjustment with HCl	4	761289	745556	797111						767985	21573.5	12455.4	53595.8	76.7985	2.15735	5.35958
experiment 16	T2	Dish	3	no	0.23 g/L Na2SiO3, pH adjustment with aeration	0	90706	92521.3	88709.1						90645.5	1556.91	898.882	3867.89	9.06455	0.155691	0.386789
experiment 16	T2	Dish	3	no	0.23 g/L Na2SiO3, pH adjustment with aeration	1	195874	189884	200775						195511	4454.04	2571.54	11065.3	19.5511	0.445404	1.10653
experiment 16	T2	Dish	3	no	0.23 g/L Na2SiO3, pH adjustment with aeration	2	352840	363005	336683						350843	10838.4	6257.55	26926.2	35.0843	1.08384	2.69262
experiment 16	T2	Dish	3	no	0.23 g/L Na2SiO3, pH adjustment with aeration	3
experiment 16	T2	Dish	3	no	0.23 g/L Na2SiO3, pH adjustment with aeration	4	686134	677179	611464						658259	33290.6	19220.3	82705	65.8259	3.32906	8.2705
experiment 17	T1	Dish	3	no	0.05 g/L Na2SiO3, pH adjustment with aeration and HCl	0	158093	164726	195900						172906	16482.9	9516.44	40949.2	17.2906	1.64829	4.09492
experiment 17	T1	Dish	3	no	0.05 g/L Na2SiO3, pH adjustment with aeration and HCl	1	140516	138194	143832						140848	2313.57	1335.74	5747.69	14.0848	0.231357	0.574769
experiment 17	T1	Dish	3	no	0.05 g/L Na2SiO3, pH adjustment with aeration and HCl	2
experiment 17	T1	Dish	3	no	0.05 g/L Na2SiO3, pH adjustment with aeration and HCl	3	553971	710837	640529						635113	64154.6	37039.7	159382	63.5113	6.41546	15.9382
experiment 17	T1	Dish	3	no	0.05 g/L Na2SiO3, pH adjustment with aeration and HCl	4	753984	865083	989448						869505	96178.8	55528.8	238941	86.9505	9.61788	23.8941
experiment 17	T1	Dish	3	no	0.05 g/L Na2SiO3, pH adjustment with aeration and HCl	5	1.41209e+06	1.60842e+06	1.82531e+06						1.61527e+06	168767	97437.9	419275	161.527	16.8767	41.9275
experiment 18	T1	Dish	3	no	Initial pH 6.0, pH adjustment with HCl	0	144984	135363	139780						140043	3932.23	2270.28	9768.99	14.0043	0.393223	0.976899
experiment 18	T1	Dish	3	no	Initial pH 6.0, pH adjustment with HCl	1	60874.1	53310.2	59179.8						57788	3240.97	1871.17	8051.65	5.7788	0.324097	0.805165
experiment 18	T1	Dish	3	no	Initial pH 6.0, pH adjustment with HCl	2	23478.3	22389.1	18455.9						21441.1	2157.19	1245.45	5359.19	2.14411	0.215719	0.535919
experiment 18	T1	Dish	3	no	Initial pH 6.0, pH adjustment with HCl	3	7019.28	12223.2	6837.74						8693.41	2497.05	1441.67	6203.52	0.869341	0.249705	0.620352
experiment 18	T1	Dish	3	no	Initial pH 6.0, pH adjustment with HCl	4	0	1210.22	0						403.407	570.503	329.38	1417.32	0.0403407	0.0570503	0.141732
experiment 18	T2	Dish	3	no	Initial pH 6.5, pH adjustment with HCl	0	126710	131611	125560						127961	2623.85	1514.88	6518.53	12.7961	0.262385	0.651853
experiment 18	T2	Dish	3	no	Initial pH 6.5, pH adjustment with HCl	1	46230.4	57182.9	59603.3						54338.9	5818.08	3359.07	14454.1	5.43389	0.581808	1.44541
experiment 18	T2	Dish	3	no	Initial pH 6.5, pH adjustment with HCl	2	17003.6	24325.4	20755.3						20694.8	2989.43	1725.95	7426.76	2.06948	0.298943	0.742676
experiment 18	T2	Dish	3	no	Initial pH 6.5, pH adjustment with HCl	3	5990.59	5930.08	6958.77						6293.14	471.313	272.113	1170.9	0.629314	0.0471313	0.11709
experiment 18	T2	Dish	3	no	Initial pH 6.5, pH adjustment with HCl	4	0	0	0						0	0	0	0	0	0	0
experiment 18	T3	Dish	3	no	Initial pH 7.0, pH adjustment with HCl	0	125016	127194	126589						126266	918.138	530.087	2280.97	12.6266	0.0918138	0.228097
experiment 18	T3	Dish	3	no	Initial pH 7.0, pH adjustment with HCl	1	70918.9	68861.5	85199.5						74993.3	7265.58	4194.78	18050.2	7.49933	0.726558	1.80502
experiment 18	T3	Dish	3	no	Initial pH 7.0, pH adjustment with HCl	2	35398.9	36064.6	40965.9						37476.5	2482.34	1433.18	6166.98	3.74765	0.248234	0.616698
experiment 18	T3	Dish	3	no	Initial pH 7.0, pH adjustment with HCl	3	16519.5	20634.3	25475.1						20876.3	3660.12	2113.17	9092.98	2.08763	0.366012	0.909298
experiment 18	T3	Dish	3	no	Initial pH 7.0, pH adjustment with HCl	4	12888.8	13312.4	14885.7						13695.7	859.076	495.988	2134.24	1.36957	0.0859076	0.213424
experiment 18	T4	Dish	3	no	Initial pH 7.5, pH adjustment with HCl	0	84412.8	117210	103111						101578	13433.1	7755.61	33372.4	10.1578	1.34331	3.33724
experiment 18	T4	Dish	3	no	Initial pH 7.5, pH adjustment with HCl	1	43870.5	53975.8	76970						58272.1	13850.1	7996.36	34408.3	5.82721	1.38501	3.44083
experiment 18	T4	Dish	3	no	Initial pH 7.5, pH adjustment with HCl	2	13675.5	25535.6	33039						24083.4	7971.54	4602.37	19804	2.40834	0.797154	1.9804
experiment 18	T4	Dish	3	no	Initial pH 7.5, pH adjustment with HCl	3	968.176	13251.9	17669.2						10629.8	7065.78	4079.43	17553.8	1.06298	0.706578	1.75538
experiment 18	T4	Dish	3	no	Initial pH 7.5, pH adjustment with HCl	4	10710.4	7745.41	5203.95						7886.6	2250.24	1299.17	5590.35	0.78866	0.225024	0.559035
experiment 18	T5	Dish	3	no	Initial pH 8.0, pH adjustment with HCl	0	121869	126831	105592						118097	9071.85	5237.64	22537.6	11.8097	0.907185	2.25376
experiment 18	T5	Dish	3	no	Initial pH 8.0, pH adjustment with HCl	1	73218.3	52402.5	44717.6						56779.5	12039.9	6951.27	29911.3	5.67795	1.20399	2.99113
experiment 18	T5	Dish	3	no	Initial pH 8.0, pH adjustment with HCl	2	31828.8	19968.6	16459						22752.1	6576.15	3796.74	16337.4	2.27521	0.657615	1.63374
experiment 18	T5	Dish	3	no	Initial pH 8.0, pH adjustment with HCl	3	11436.6	4901.39	6837.74						7725.24	2740.79	1582.4	6809.05	0.772524	0.274079	0.680905
experiment 18	T5	Dish	3	no	Initial pH 8.0, pH adjustment with HCl	4	2057.37	0	0						685.791	969.855	559.946	2409.45	0.0685791	0.0969855	0.240945
experiment 18	T6	Dish	3	no	no HCl, pH adjustment with aeration	0	126347	111401	109041						115596	7662.76	4424.1	19036.9	11.5596	0.766276	1.90369
experiment 18	T6	Dish	3	no	no HCl, pH adjustment with aeration	1	54883.5	55125.5	48106.2						52705.1	3253.37	1878.33	8082.47	5.27051	0.325337	0.808247
experiment 18	T6	Dish	3	no	no HCl, pH adjustment with aeration	2	24749	18274.3	22389.1						21804.1	2675.44	1544.67	6646.7	2.18041	0.267544	0.66467
experiment 18	T6	Dish	3	no	no HCl, pH adjustment with aeration	3	50829.2	52947.1	54217.9						52664.7	1397.73	806.981	3472.44	5.26647	0.139773	0.347244
experiment 18	T6	Dish	3	no	no HCl, pH adjustment with aeration	4	182017	181715	173001						178911	4180.76	2413.76	10386.4	17.8911	0.418076	1.03864
experiment 19	T1	Dish	3	no	no pH adjustment with HCl, only aeration	0	149765	149765	149765						149765	0	0	0	14.9765	0	0
experiment 19	T1	Dish	3	no	no pH adjustment with HCl, only aeration	1
experiment 19	T1	Dish	3	no	no pH adjustment with HCl, only aeration	2
experiment 19	T1	Dish	3	no	no pH adjustment with HCl, only aeration	3	377286	365971	407421						383559	17493.6	10099.9	43460	38.3559	1.74936	4.346
experiment 19	T1	Dish	3	no	no pH adjustment with HCl, only aeration	4	665682	590345	605897						620641	32475	18749.4	80678.8	62.0641	3.2475	8.06788
experiment 19	T1	Dish	3	no	no pH adjustment with HCl, only aeration	5	926605	917286	870572						904821	24514.8	14153.7	60903.2	90.4821	2.45148	6.09032
experiment 2	T1	Dish	3	no	12/12h light/dark, ca. 16 par	0	73075.9	71248.5	68812						71045.4	1746.66	1008.43	4339.29	7.10454	0.174666	0.433929
experiment 2	T1	Dish	3	no	12/12h light/dark, ca. 16 par	1	20893.3	0	14395.9						11763.1	8730.47	5040.54	21689.4	1.17631	0.873047	2.16894
experiment 2	T1	Dish	3	no	12/12h light/dark, ca. 16 par	2
experiment 2	T1	Dish	3	no	12/12h light/dark, ca. 16 par	3	18659.8	0	182.74						6280.86	8753.58	5053.88	21746.8	0.628086	0.875358	2.17468
experiment 2	T1	Dish	3	no	12/12h light/dark, ca. 16 par	4
experiment 2	T1	Dish	3	no	12/12h light/dark, ca. 16 par	5	147390	66984.5	103127						105834	32881.3	18984	81688.3	10.5834	3.28813	8.16883
experiment 2	T2	Dish	3	no	12/12h light/dark, 60 – 80 par	0	90740.8	69421.1	88710.4						82957.4	9607.46	5546.87	23868.2	8.29574	0.960746	2.38682
experiment 2	T2	Dish	3	no	12/12h light/dark, 60 – 80 par	1	22923.8	10944.1	10335						14734.3	5796.18	3346.42	14399.7	1.47343	0.579618	1.43997
experiment 2	T2	Dish	3	no	12/12h light/dark, 60 – 80 par	2
experiment 2	T2	Dish	3	no	12/12h light/dark, 60 – 80 par	3	38761.3	71045.4	65563.2						58456.7	14105.4	8143.77	35042.6	5.84567	1.41054	3.50426
experiment 2	T2	Dish	3	no	12/12h light/dark, 60 – 80 par	4
experiment 2	T2	Dish	3	no	12/12h light/dark, 60 – 80 par	5	874291	489521	383329						582380	210916	121772	523986	58.238	21.0916	52.3986
experiment 2	T3	Flask	3	no	12/12h light/dark, ca. 16 par	0	117340	107797	108203						111113	4406.07	2543.85	10946.2	11.1113	0.440607	1.09462
experiment 2	T3	Flask	3	no	12/12h light/dark, ca. 16 par	1	105157	211756	85258.6						134057	55538.5	32065.2	137976	13.4057	5.55385	13.7976
experiment 2	T3	Flask	3	no	12/12h light/dark, ca. 16 par	2
experiment 2	T3	Flask	3	no	12/12h light/dark, ca. 16 par	3	134192	142314	70842.4						115783	31950.3	18446.5	79375.4	11.5783	3.19503	7.93754
experiment 2	T3	Flask	3	no	12/12h light/dark, ca. 16 par	4
experiment 2	T3	Flask	3	no	12/12h light/dark, ca. 16 par	5	181705	220893	235715						212771	22785.1	13155	56605.9	21.2771	2.27851	5.66059
experiment 2	T4	Flask	3	no	12/12h light/dark, 60 – 80 par	0	77949	70436.3	92365.2						80250.2	9099.09	5253.36	22605.2	8.02502	0.909909	2.26052
experiment 2	T4	Flask	3	no	12/12h light/dark, 60 – 80 par	1	70842.4	73888.1	82416						75715.5	4898.39	2828.09	12169.3	7.57155	0.489839	1.21693
experiment 2	T4	Flask	3	no	12/12h light/dark, 60 – 80 par	2
experiment 2	T4	Flask	3	no	12/12h light/dark, 60 – 80 par	3	377237	115106	452567						314970	144633	83503.6	359316	31.497	14.4633	35.9316
experiment 2	T4	Flask	3	no	12/12h light/dark, 60 – 80 par	4
experiment 2	T4	Flask	3	no	12/12h light/dark, 60 – 80 par	5	420283	365461	581298						455680	91601	52885.9	227568	45.568	9.1601	22.7568
experiment 20	T1	Dish	3	no	Na2SiO3 0.02 g/L, pH adjustment with aeration	0	158524	157529	155539						157197	1240.88	716.424	3082.77	15.7197	0.124088	0.308277
experiment 20	T1	Dish	3	no	Na2SiO3 0.02 g/L, pH adjustment with aeration	1
experiment 20	T1	Dish	3	no	Na2SiO3 0.02 g/L, pH adjustment with aeration	2
experiment 20	T1	Dish	3	no	Na2SiO3 0.02 g/L, pH adjustment with aeration	3
experiment 20	T1	Dish	3	no	Na2SiO3 0.02 g/L, pH adjustment with aeration	4
experiment 20	T1	Dish	3	no	Na2SiO3 0.02 g/L, pH adjustment with aeration	5
experiment 20	T1	Dish	3	no	Na2SiO3 0.02 g/L, pH adjustment with aeration	6	3.15191e+06	3.22653e+06	3.17711e+06						3.18518e+06	30992.9	17893.8	76996.9	318.518	3.09929	7.69969
experiment 20	T1	Dish	3	no	Na2SiO3 0.02 g/L, pH adjustment with aeration	7
experiment 20	T1	Dish	3	no	Na2SiO3 0.02 g/L, pH adjustment with aeration	8	5.4323e+06	5.46911e+06	5.82297e+06						5.57479e+06	176130	101689	437567	557.479	17.613	43.7567
experiment 20	T2	Dish	3	no	NaHCO3 0.04 g/L, pH adjustment with aeration	0	154876	144263	154213						151117	4853.99	2802.45	12059	15.1117	0.485399	1.2059
experiment 20	T2	Dish	3	no	NaHCO3 0.04 g/L, pH adjustment with aeration	1
experiment 20	T2	Dish	3	no	NaHCO3 0.04 g/L, pH adjustment with aeration	2
experiment 20	T2	Dish	3	no	NaHCO3 0.04 g/L, pH adjustment with aeration	3
experiment 20	T2	Dish	3	no	NaHCO3 0.04 g/L, pH adjustment with aeration	4
experiment 20	T2	Dish	3	no	NaHCO3 0.04 g/L, pH adjustment with aeration	5
experiment 20	T2	Dish	3	no	NaHCO3 0.04 g/L, pH adjustment with aeration	6	1.3972e+06	1.9192e+06	1.88106e+06						1.73249e+06	237595	137176	590267	173.249	23.7595	59.0267
experiment 20	T2	Dish	3	no	NaHCO3 0.04 g/L, pH adjustment with aeration	7
experiment 20	T2	Dish	3	no	NaHCO3 0.04 g/L, pH adjustment with aeration	8	3.48985e+06	4.3289e+06	4.3153e+06
experiment 3	T1	Dish	3	no	60 par first 24h, then 16 par 12/12h	0	65360.2	67390.6	73888.1						68879.6	3637.22	2099.95	9036.09	6.88796	0.363722	0.903609
experiment 3	T1	Dish	3	no	60 par first 24h, then 16 par 12/12h	1	5868	385.785	9522.81						5258.87	3754.96	2167.93	9328.59	0.525887	0.375496	0.932859
experiment 3	T1	Dish	3	no	60 par first 24h, then 16 par 12/12h	2	32873	29624.3	32466.9						31654.7	1445.28	834.436	3590.58	3.16547	0.144528	0.359058
experiment 3	T1	Dish	3	no	60 par first 24h, then 16 par 12/12h	3
experiment 3	T1	Dish	3	no	60 par first 24h, then 16 par 12/12h	4	488100	420892	334598						414530	62828.2	36273.9	156087	41.453	6.28282	15.6087
experiment 3	T2	Flask	3	no	60 par first 24h, then 16 par 12/12h	0	77542.9	73685	83837.3						78355.1	4184.24	2415.77	10395.1	7.83551	0.418424	1.03951
experiment 3	T2	Flask	3	no	60 par first 24h, then 16 par 12/12h	1	130741	42619.1	99268.7						90876.2	36461.6	21051.1	90583	9.08762	3.64616	9.0583
experiment 3	T2	Flask	3	no	60 par first 24h, then 16 par 12/12h	2	39573.5	28812.1	74700.3						47695.3	19594.3	11312.8	48678.8	4.76953	1.95943	4.86788
experiment 3	T2	Flask	3	no	60 par first 24h, then 16 par 12/12h	3
experiment 3	T2	Flask	3	no	60 par first 24h, then 16 par 12/12h	4	652363	579267	534597						588743	48542.4	28026	120596	58.8743	4.85424	12.0596
experiment 4	T1	Dish	3	no	60 par first 24h, then 16 par 12/12h, pre-adapted algae	0	111930	110902	79215.7	97719.5	116526	91551.6			101307	13118.6	5355.64	13769.3	10.1307	1.31186	1.37693
experiment 4	T1	Dish	3	no	60 par first 24h, then 16 par 12/12h, pre-adapted algae	1	28481.4	14210.4	8647.21	-2902.56	2721.15	7861.1			9836.45	9874.13	4031.1	10364	0.983645	0.987413	1.0364
experiment 4	T1	Dish	3	no	60 par first 24h, then 16 par 12/12h, pre-adapted algae	2
experiment 4	T1	Dish	3	no	60 par first 24h, then 16 par 12/12h, pre-adapted algae	3	98989.4	117856	110962	118037	136662	121303			117302	11307.9	4616.44	11868.9	11.7302	1.13079	1.18689
experiment 4	T1	Dish	3	no	60 par first 24h, then 16 par 12/12h, pre-adapted algae	4	242666	299568	299447	231056	312328	357620			290447	42750.1	17452.7	44870.8	29.0447	4.27501	4.48708
experiment 4	T1	Dish	3	no	60 par first 24h, then 16 par 12/12h, pre-adapted algae	5	398437	409321	310030	265403	409200	424923			369552	59782.7	24406.2	62748.3	36.9552	5.97827	6.27483
experiment 4	T1	Dish	3	yes	60 par first 24h, then 16 par 12/12h, pre-adapted algae	0	111930	110902	79215.7	97719.5	116526	91551.6			101307	13118.6	5355.64	13769.3	10.1307	1.31186	1.37693
experiment 4	T1	Dish	3	yes	60 par first 24h, then 16 par 12/12h, pre-adapted algae	1	150570	206082	147184	127289	120577	142044			148958	27663.7	11293.6	29036	14.8958	2.76637	2.9036
experiment 4	T1	Dish	3	yes	60 par first 24h, then 16 par 12/12h, pre-adapted algae	2
experiment 4	T1	Dish	3	yes	60 par first 24h, then 16 par 12/12h, pre-adapted algae	3	387552	536429	489988	288140	502324	390032			432411	85289.1	34819.1	89520	43.2411	8.52891	8.952
experiment 4	T1	Dish	3	yes	60 par first 24h, then 16 par 12/12h, pre-adapted algae	4	511818	532801	457576	359252	588192	490714			490059	70824.1	28913.8	74337.4	49.0059	7.08241	7.43374
experiment 4	T1	Dish	3	yes	60 par first 24h, then 16 par 12/12h, pre-adapted algae	5	652411	614073	537639	440403	614254	617882			579444	71054.7	29008	74579.5	57.9444	7.10547	7.45795
experiment 4	T1	Dish	3		mixed-unmixed	0	0	0	0	0	0	0
experiment 4	T1	Dish	3		mixed-unmixed	1	122089	191871	138537	130192	117856	134183			139121	24594.5	10040.7	25814.6	13.9121	2.45945	2.58146
experiment 4	T1	Dish	3		mixed-unmixed	2
experiment 4	T1	Dish	3		mixed-unmixed	3	288563	418573	379026	170102	365662	268729			315109	82894.2	33841.4	87006.3	31.5109	8.28942	8.70063
experiment 4	T1	Dish	3		mixed-unmixed	4	269152	233233	158129	128196	275864	133094			199611	61949.1	25290.6	65022.2	19.9611	6.19491	6.50222
experiment 4	T1	Dish	3		mixed-unmixed	5	253974	204751	227609	175000	205054	192960			209891	25202.8	10289	26453	20.9891	2.52028	2.6453
experiment 4	T2	Flask	3	no	60 par first 24h, then 16 par 12/12h, pre-adapted algae	0	109027	148454	117493						124991	16946.6	9784.1	42101	12.4991	1.69466	4.2101
experiment 4	T2	Flask	3	no	60 par first 24h, then 16 par 12/12h, pre-adapted algae	1	48073.6	107032	87560.6						80888.7	24527.6	14161	60934.8	8.08887	2.45276	6.09348
experiment 4	T2	Flask	3	no	60 par first 24h, then 16 par 12/12h, pre-adapted algae	2
experiment 4	T2	Flask	3	no	60 par first 24h, then 16 par 12/12h, pre-adapted algae	3	1.39401e+06	672729	442278						836340	405403	234060	1.00716e+06	83.634	40.5403	100.716
experiment 4	T2	Flask	3	no	60 par first 24h, then 16 par 12/12h, pre-adapted algae	4	1161024	974172	681678						938958	197270	113894	490085	93.8958	19.727	49.0085
experiment 4	T2	Flask	3	no	60 par first 24h, then 16 par 12/12h, pre-adapted algae	5	1.16762e+06	742693	720440						876916	205756	118793	511168	87.6916	20.5756	51.1168
experiment 4	T2	Flask	3	yes	60 par first 24h, then 16 par 12/12h, pre-adapted algae	0	109027	148454	117493						124991	16946.6	9784.1	42101	12.4991	1.69466	4.2101
experiment 4	T2	Flask	3	yes	60 par first 24h, then 16 par 12/12h, pre-adapted algae	1	333673	271027	260686						288462	32246.8	18617.7	80112	28.8462	3.22468	8.0112
experiment 4	T2	Flask	3	yes	60 par first 24h, then 16 par 12/12h, pre-adapted algae	2
experiment 4	T2	Flask	3	yes	60 par first 24h, then 16 par 12/12h, pre-adapted algae	3	1.00574e+06	760410	945630						903926	104405	60278.5	259378	90.3926	10.4405	25.9378
experiment 4	T2	Flask	3	yes	60 par first 24h, then 16 par 12/12h, pre-adapted algae	4	1.43036e+06	1.09058e+06	1.1372e+06						1.21938e+06	150395	86830.3	373631	121.938	15.0395	37.3631
experiment 4	T2	Flask	3	yes	60 par first 24h, then 16 par 12/12h, pre-adapted algae	5	1.68856e+06	1.32272e+06	1.33506e+06						1.44878e+06	169627	97934.5	421412	144.878	16.9627	42.1412
experiment 4	T2	Flask	3		mixed-unmixed	0	0	0	0						0	0	0		0	0	0
experiment 4	T2	Flask	3		mixed-unmixed	1	285600	163995	173126						207573	55298.8	31926.8	137381	20.7573	5.52988	13.7381
experiment 4	T2	Flask	3		mixed-unmixed	2
experiment 4	T2	Flask	3		mixed-unmixed	3	0	87681.5	503352						197011	219554	126759	545445	19.7011	21.9554	54.5445
experiment 4	T2	Flask	3		mixed-unmixed	4	269333	116405	455521						280420	138665	80058.4	344491	28.042	13.8665	34.4491
experiment 4	T2	Flask	3		mixed-unmixed	5	520949	580028	614617						571865	38673	22327.9	96076.9	57.1865	3.8673	9.60769
experiment 5	T1	Dish	3	no	300 par first 24h, then ca. 16 par	0	117543	98050.4	96223						103939	9648.38	5570.49	23969.8	10.3939	0.964838	2.39698
experiment 5	T1	Dish	3	no	300 par first 24h, then ca. 16 par	1	38761.3	19269	12162.4						23397.6	11244.5	6492.03	27935.2	2.33976	1.12445	2.79352
experiment 5	T1	Dish	3	no	300 par first 24h, then ca. 16 par	2	0	0	0
experiment 5	T1	Dish	3	no	300 par first 24h, then ca. 16 par	3	4852.78	0	16832.4						7228.4	7074.15	4084.26	17574.6	0.72284	0.707415	1.75746
experiment 5	T1	Dish	3	no	300 par first 24h, then ca. 16 par	4	3431.46	0	0						1143.82	1617.61	933.925	4018.68	0.114382	0.161761	0.401868
experiment 5	T1	Dish	3	yes	300 par first 24h, then ca. 16 par	0	117543	98050.4	96223						103939	9648.38	5570.49	23969.8	10.3939	0.964838	2.39698
experiment 5	T1	Dish	3	yes	300 par first 24h, then ca. 16 par	1	204446	201197	184548						196730	8715.97	5032.17	21653.4	19.673	0.871597	2.16534
experiment 5	T1	Dish	3	yes	300 par first 24h, then ca. 16 par	2	169319	162213	250943						194158	40257.7	23242.8	100014	19.4158	4.02577	10.0014
experiment 5	T1	Dish	3	yes	300 par first 24h, then ca. 16 par	3	139269	142314	111045						130876	14077.5	8127.63	34973.2	13.0876	1.40775	3.49732
experiment 5	T1	Dish	3	yes	300 par first 24h, then ca. 16 par	4	216832	229218	140284						195444	39330.8	22707.6	97711	19.5444	3.93308	9.7711
experiment 5	T1	Dish	3		mixed-unmixed	0	0	0	0
experiment 5	T1	Dish	3		mixed-unmixed	1	165685	181928	172385						173333	6665.18	3848.15	16558.6	17.3333	0.666518	1.65586
experiment 5	T1	Dish	3		mixed-unmixed	2	169319	162213	250943						194158	40257.7	23242.8	100014	19.4158	4.02577	10.0014
experiment 5	T1	Dish	3		mixed-unmixed	3	134416	142314	94212.9						123648	21061.8	12160	52324.7	12.3648	2.10618	5.23247
experiment 5	T1	Dish	3		mixed-unmixed	4	213400	229218	140284						194301	38737.6	22365.2	96237.3	19.4301	3.87376	9.62373
experiment 5	T2	Flask	3		mixed-unmixed	0	97847.4	107391	79979.4						95072.4	11361.3	6559.42	28225.2	9.50724	1.13613	2.82252
experiment 5	T2	Flask	3	no	300 par first 24h, then ca. 16 par	1	43025.2	17035.5	43431.3						34497.3	12348.5	7129.42	30677.9	3.44973	1.23485	3.06779
experiment 5	T2	Flask	3	no	300 par first 24h, then ca. 16 par	2	3837.55	65766.3	24751.2						31451.7	25722.4	14850.8	63903.2	3.14517	2.57224	6.39032
experiment 5	T2	Flask	3	no	300 par first 24h, then ca. 16 par	3	288913	630231	479369						466171	139655	80629.8	346950	46.6171	13.9655	34.695
experiment 5	T2	Flask	3	no	300 par first 24h, then ca. 16 par	4	847896	1.21967e+06	1.36241e+06						1.14333e+06	216876	125214	538794	114.333	21.6876	53.8794
experiment 5	T2	Flask	3	yes	300 par first 24h, then ca. 16 par	0	97847.4	107391	79979.4						95072.4	11361.3	6559.42	28225.2	9.50724	1.13613	2.82252
experiment 5	T2	Flask	3	yes	300 par first 24h, then ca. 16 par	1	221705	364852	382516						323024	72005.7	41572.5	178887	32.3024	7.20057	17.8887
experiment 5	T2	Flask	3	yes	300 par first 24h, then ca. 16 par	2	436120	629825	537643						534529	79110.3	45674.4	196537	53.4529	7.91103	19.6537
experiment 5	T2	Flask	3	yes	300 par first 24h, then ca. 16 par	3	804038	1.14982e+06	956119						969993	141507	81699.1	351551	96.9993	14.1507	35.1551
experiment 5	T2	Flask	3	yes	300 par first 24h, then ca. 16 par	4	1.39713e+06	1.91185e+06	1.67246e+06						1.66048e+06	210304	121419	522466	166.048	21.0304	52.2466
experiment 5	T2	Flask	3		mixed-unmixed	0	0	0	0
experiment 5	T2	Flask	3		mixed-unmixed	1	178680	347816	339085						288527	77755.5	44892.2	193171	28.8527	7.77555	19.3171
experiment 5	T2	Flask	3		mixed-unmixed	2	432283	564059	512892						503078	54243.1	31317.3	134758	50.3078	5.42431	13.4758
experiment 5	T2	Flask	3		mixed-unmixed	3	515125	519592	476750						503822	19229.9	11102.4	47773.7	50.3822	1.92299	4.77737
experiment 5	T2	Flask	3		mixed-unmixed	4	549237	692180	310050						517156	157645	91016.3	391643	51.7156	15.7645	39.1643
experiment 6	T1	Dish	3	no	Inoculation 2 x 104 cells/mL algae	0	117211	112296	130118						119875	7515.96	4339.34	18672.2	11.9875	0.751596	1.86722
experiment 6	T1	Dish	3	no	Inoculation 2 x 104 cells/mL algae	1	4915.51	4059.26	28700.3						12558.3	11419.4	6593	28369.7	1.25583	1.14194	2.83697
experiment 6	T1	Dish	3	no	Inoculation 2 x 104 cells/mL algae	2
experiment 6	T1	Dish	3	no	Inoculation 2 x 104 cells/mL algae	3	3203.01	7103.71	475.695						3594.14	2719.97	1570.38	6757.34	0.359414	0.271997	0.675734
experiment 6	T1	Dish	3	no	Inoculation 2 x 104 cells/mL algae	4	15697.9	25307	14936.8						18647.2	4719.38	2724.74	11724.5	1.86472	0.471938	1.17245
experiment 6	T1	Dish	3	no	Inoculation 2 x 104 cells/mL algae	5	24228.7	73701	37928.7						45286.2	20856.3	12041.4	51814	4.52862	2.08563	5.1814
experiment 6	T2	Dish	3	no	Inoculation 5 x 104 cells/mL algae	0	302796	289127	267341						286421	14600.4	8429.57	36272.4	28.6421	1.46004	3.62724
experiment 6	T2	Dish	3	no	Inoculation 5 x 104 cells/mL algae	1	21660	22484.5	57971.4						34038.6	16926.4	9772.43	42050.8	3.40386	1.69264	4.20508
experiment 6	T2	Dish	3	no	Inoculation 5 x 104 cells/mL algae	2
experiment 6	T2	Dish	3	no	Inoculation 5 x 104 cells/mL algae	3	82485.5	96756.4	52770.4						77337.4	18322.4	10578.5	45519.1	7.73374	1.83224	4.55191
experiment 6	T2	Dish	3	no	Inoculation 5 x 104 cells/mL algae	4	154696	147497	119685						140626	15096.5	8715.95	37504.7	14.0626	1.50965	3.75047
experiment 6	T2	Dish	3	no	Inoculation 5 x 104 cells/mL algae	5	258683	215617	265993						246764	22225.8	12832.1	55216.5	24.6764	2.22258	5.52165
experiment 6	T3	Dish	3	no	Inoculation 10 x 104 cells/mL algae	0	647421	653066	658774						653087	4634.97	2676	11514.8	65.3087	0.463497	1.15148
experiment 6	T3	Dish	3	no	Inoculation 10 x 104 cells/mL algae	1	384679	337141	331306						351042	23903.9	13800.9	59385.4	35.1042	2.39039	5.93854
experiment 6	T3	Dish	3	no	Inoculation 10 x 104 cells/mL algae	2
experiment 6	T3	Dish	3	no	Inoculation 10 x 104 cells/mL algae	3	609651	628647	513402						583900	50449.2	29126.9	125333	58.39	5.04492	12.5333
experiment 6	T3	Dish	3	no	Inoculation 10 x 104 cells/mL algae	4	841124	871188	801166						837826	28681.5	16559.2	71254.4	83.7826	2.86815	7.12544
experiment 6	T3	Dish	3	no	Inoculation 10 x 104 cells/mL algae	5	1.16789e+06	1.22739e+06	1.08934e+06						1.16154e+06	56536.1	32641.1	140455	116.154	5.65361	14.0455
experiment 6	T4	Dish	3	no	Inoculation 20 x 104 cells/mL algae	0	1.17319e+06	1.24845e+06	1.24042e+06						1.22069e+06	33743.7	19482	83830.9	122.069	3.37437	8.38309
experiment 6	T4	Dish	3	no	Inoculation 20 x 104 cells/mL algae	1	1.2004e+06	1.26081e+06	1.22374e+06						1.22832e+06	24875.1	14361.6	61798.1	122.832	2.48751	6.17981
experiment 6	T4	Dish	3	no	Inoculation 20 x 104 cells/mL algae	2
experiment 6	T4	Dish	3	no	Inoculation 20 x 104 cells/mL algae	3	1.94547e+06	2.10492e+06	2.06997e+06						2.04012e+06	68433.4	39510	170012	204.012	6.84334	17.0012
experiment 6	T4	Dish	3	no	Inoculation 20 x 104 cells/mL algae	4	2.31067e+06	2.60668e+06	2.46321e+06						2.46019e+06	120864	69780.9	300267	246.019	12.0864	30.0267
experiment 6	T4	Dish	3	no	Inoculation 20 x 104 cells/mL algae	5	2.87034e+06	2.92736e+06	2.86394e+06						2.88721e+06	28509.6	16460	70827.5	288.721	2.85096	7.08275
experiment 7	T1	Dish	3	no	Newly purchased dishes	0	74858.2	77977.2	85271.1						79368.8	4363.47	2519.25	10840.3	7.93688	0.436347	1.08403
experiment 7	T1	Dish	3	no	Newly purchased dishes	1	18090.7	7005.96	12044.5						12380.4	4531.57	2616.3	11257.9	1.23804	0.453157	1.12579
experiment 7	T1	Dish	3	no	Newly purchased dishes	2	1727.5	0	0						575.832	814.349	470.165	2023.12	0.0575832	0.0814349	0.202312
experiment 7	T1	Dish	3	no	Newly purchased dishes	3	8109.63	3982.84	7485.82						6526.1	1816.3	1048.64	4512.3	0.65261	0.18163	0.45123
experiment 7	T1	Dish	3	no	Newly purchased dishes	4	45250.8	23993	18138.7						29127.5	11648.7	6725.39	28939.3	2.91275	1.16487	2.89393
experiment 7	T1	Dish	3	yes	Newly purchased dishes	0	74858.2	77977.2	85271.1						79368.8	4363.47	2519.25	10840.3	7.93688	0.436347	1.08403
experiment 7	T1	Dish	3	yes	Newly purchased dishes	1	158642	174189	185274						172702	10923.3	6306.58	27137.2	17.2702	1.09233	2.71372
experiment 7	T1	Dish	3	yes	Newly purchased dishes	2	210563	229757	248280						229533	15398.7	8890.45	38255.6	22.9533	1.53987	3.82556
experiment 7	T1	Dish	3	yes	Newly purchased dishes	3	299001	281726	266514						282414	13271.5	7662.29	32970.8	28.2414	1.32715	3.29708
experiment 7	T1	Dish	3	yes	Newly purchased dishes	4	278127	329952	329280						312453	24273.7	14014.4	60304	31.2453	2.42737	6.0304
experiment 7	T1	Dish	3		mixed-unmixed	0	0	0	0						0	0	0	0	0	0	0
experiment 7	T1	Dish	3		mixed-unmixed	1	140551	167183	173229						160321	14195.9	8196.01	35267.4	16.0321	1.41959	3.52674
experiment 7	T1	Dish	3		mixed-unmixed	2	208835	229757	248280						228957	16113.1	9302.89	40030.3	22.8957	1.61131	4.00303
experiment 7	T1	Dish	3		mixed-unmixed	3	290891	277743	259028						275888	13073.9	7548.22	32480	27.5888	1.30739	3.248
experiment 7	T1	Dish	3		mixed-unmixed	4	232876	305959	311141						283325	35735.7	20632	88779.6	28.3325	3.57357	8.87796
experiment 7	T2	Flask	3		mixed-unmixed	0	79992.7	77641.3	84791.3						80808.4	2975.39	1717.84	7391.88	8.08084	0.297539	0.739188
experiment 7	T2	Flask	3	no	Flasks used for previous tests	1	99906.9	43043.4	74954.1						72634.8	23272.2	13436.2	57816.1	7.26348	2.32722	5.78161
experiment 7	T2	Flask	3	no	Flasks used for previous tests	2	2927.15	12284.4	61614						25608.5	25744.7	14863.7	63958.6	2.56085	2.57447	6.39586
experiment 7	T2	Flask	3	no	Flasks used for previous tests	3	14155.9	19002.5	4174.78						12444.4	6173.16	3564.08	15336.2	1.24444	0.617316	1.53362
experiment 7	T2	Flask	3	no	Flasks used for previous tests	4	79992.7	77641.3	84791.3						80808.4	2975.39	1717.84	7391.88	8.08084	0.297539	0.739188
experiment 7	T2	Flask	3	yes	Flasks used for previous tests	0	79992.7	77641.3	84791.3						80808.4	2975.39	1717.84	7391.88	8.08084	0.297539	0.739188
experiment 7	T2	Flask	3	yes	Flasks used for previous tests	1	125052	138680	131482						131738	5566.56	3213.85	13829.2	13.1738	0.556656	1.38292
experiment 7	T2	Flask	3	yes	Flasks used for previous tests	2	245640	248711	167951						220768	37368	21574.4	92834.8	22.0768	3.7368	9.28348
experiment 7	T2	Flask	3	yes	Flasks used for previous tests	3	297225	278319	280382						285309	8468.26	4889.15	21038	28.5309	0.846826	2.1038
experiment 7	T2	Flask	3	yes	Flasks used for previous tests	4	451932	748822	660095						620283	124431	71840.2	309129	62.0283	12.4431	30.9129
experiment 7	T2	Flask	3		mixed-unmixed	0	0	0	0						0	0	0	0	0	0	0
experiment 7	T2	Flask	3		mixed-unmixed	1	25144.7	95636.1	56527.5						59102.8	28835.6	16648.2	71637.3	5.91028	2.88356	7.16373
experiment 7	T2	Flask	3		mixed-unmixed	2	242713	236427	106337						195159	62859.1	36291.7	156163	19.5159	6.28591	15.6163
experiment 7	T2	Flask	3		mixed-unmixed	3	283069	259316	276207						272864	9981.11	5762.6	24796.5	27.2864	0.998111	2.47965
experiment 8	T1	Dish	3	no	Inoculation 2 x 104 cells/mL algae	0	116564	110701	107646						111637	3700.76	2136.64	9193.95	11.1637	0.370076	0.919395
experiment 8	T1	Dish	3	no	Inoculation 2 x 104 cells/mL algae	1	29399.2	27169.5	33115.4						29894.7	2452.56	1415.99	6092.99	2.98947	0.245256	0.609299
experiment 8	T1	Dish	3	no	Inoculation 2 x 104 cells/mL algae	2	4005.23	1981.97	1486.48						2491.22	1089.51	629.026	2706.7	0.249122	0.108951	0.27067
experiment 8	T1	Dish	3	no	Inoculation 2 x 104 cells/mL algae	3	6771.72	6771.72	7102.05						6881.83	155.718	89.9039	386.856	0.688183	0.0155718	0.0386856
experiment 8	T1	Dish	3	no	Inoculation 2 x 104 cells/mL algae	4
experiment 8	T1	Dish	3	no	Inoculation 2 x 104 cells/mL algae	5	141793	154428	75603.8						123942	34567.2	19957.4	85876.5	12.3942	3.45672	8.58765
experiment 8	T2	Dish	3	no	Inoculation 5 x 104 cells/mL algae	0	273057	293496	273594						280049	9511.06	5491.21	23628.7	28.0049	0.951106	2.36287
experiment 8	T2	Dish	3	no	Inoculation 5 x 104 cells/mL algae	1	42901.3	43231.7	63505.6						49879.5	9636	5563.35	23939.1	4.98795	0.9636	2.39391
experiment 8	T2	Dish	3	no	Inoculation 5 x 104 cells/mL algae	2	17879	19943.6	47154.3						28325.6	13340.6	7702.17	33142.4	2.83256	1.33406	3.31424
experiment 8	T2	Dish	3	no	Inoculation 5 x 104 cells/mL algae	3	35675.4	40795.5	76594.8						51021.9	18203.2	10509.6	45222.8	5.10219	1.82032	4.52228
experiment 8	T2	Dish	3	no	Inoculation 5 x 104 cells/mL algae	4
experiment 8	T2	Dish	3	no	Inoculation 5 x 104 cells/mL algae	5	315587	291308	499539						368811	92968.1	53675.1	230964	36.8811	9.29681	23.0964
experiment 8	T3	Dish	3	no	Inoculation 10 x 104 cells/mL algae	0	571509	563292	564985						566595	3542.53	2045.28	8800.85	56.6595	0.354253	0.880085
experiment 8	T3	Dish	3	no	Inoculation 10 x 104 cells/mL algae	1	172225	124203	206909						167779	33910.6	19578.3	84245.3	16.7779	3.39106	8.42453
experiment 8	T3	Dish	3	no	Inoculation 10 x 104 cells/mL algae	2	196628	200757	363361						253582	77643.8	44827.7	192893	25.3582	7.76438	19.2893
experiment 8	T3	Dish	3	no	Inoculation 10 x 104 cells/mL algae	3	214961	304851	411671						310495	80405.7	46422.3	199755	31.0495	8.04057	19.9755
experiment 8	T3	Dish	3	no	Inoculation 10 x 104 cells/mL algae	4
experiment 8	T3	Dish	3	no	Inoculation 10 x 104 cells/mL algae	5	975335	1.07278e+06	1.59771e+06						1.21528e+06	273335	157810	679055	121.528	27.3335	67.9055
experiment 8	T4	Dish	3	no	Inoculation 20 x 104 cells/mL algae	0	1.08946e+06	1.11106e+06	995072						1.0652e+06	50364.1	29077.7	125122	106.52	5.03641	12.5122
experiment 8	T4	Dish	3	no	Inoculation 20 x 104 cells/mL algae	1	1.02303e+06	528855	1.04177e+06						864551	237496	137118	590021	86.4551	23.7496	59.0021
experiment 8	T4	Dish	3	no	Inoculation 20 x 104 cells/mL algae	2	1.22618e+06	882182	1.32598e+06						1.14478e+06	190102	109755	472277	114.478	19.0102	47.2277
experiment 8	T4	Dish	3	no	Inoculation 20 x 104 cells/mL algae	3	1.55845e+06	1.19533e+06	1.59664e+06						1.45014e+06	180849	104413	449290	145.014	18.0849	44.929
experiment 8	T4	Dish	3	no	Inoculation 20 x 104 cells/mL algae	4
experiment 8	T4	Dish	3	no	Inoculation 20 x 104 cells/mL algae	5	2.90523e+06	2.49736e+06	2.75485e+06						2.71915e+06	168416	97235.1	418403	271.915	16.8416	41.8403
experiment 9	T1	Dish	3	no	Inoculation 2 x 104 cells/mL algae	0	119361	128785	128528						125558	4383.36	2530.73	10889.7	12.5558	0.438336	1.08897
experiment 9	T1	Dish	3	no	Inoculation 2 x 104 cells/mL algae	1	23505.5	29446	27245.8						26732.4	2452.23	1415.8	6092.18	2.67324	0.245223	0.609218
experiment 9	T1	Dish	3	no	Inoculation 2 x 104 cells/mL algae	2
experiment 9	T1	Dish	3	no	Inoculation 2 x 104 cells/mL algae	3	12541.1	9644.21	8580.78						10255.4	1673.57	966.236	4157.71	1.02554	0.167357	0.415771
experiment 9	T1	Dish	3	no	Inoculation 2 x 104 cells/mL algae	4	5133.8	7554.02	6123.89						6270.57	993.48	573.586	2468.14	0.627057	0.099348	0.246814
experiment 9	T2	Dish	3	no	Inoculation 5 x 104 cells/mL algae	0	312172	289950	286209						296110	11459.4	6616.06	28468.9	29.611	1.14594	2.84689
experiment 9	T2	Dish	3	no	Inoculation 5 x 104 cells/mL algae	1	69563	77667.1	75613.5						74281.2	3439.99	1986.08	8546.11	7.42812	0.343999	0.854611
experiment 9	T2	Dish	3	no	Inoculation 5 x 104 cells/mL algae	2
experiment 9	T2	Dish	3	no	Inoculation 5 x 104 cells/mL algae	3	93581.8	64135.8	68572.9						75430.2	12962.3	7483.82	32202.9	7.54302	1.29623	3.22029
experiment 9	T2	Dish	3	no	Inoculation 5 x 104 cells/mL algae	4	88228	87678	76860.3						84255.4	5233.96	3021.83	13002.9	8.42554	0.523396	1.30029
experiment 9	T3	Dish	3	no	Inoculation 10 x 104 cells/mL algae	0	552360	559548	507623						539844	22971.6	13262.7	57069.3	53.9844	2.29716	5.70693
experiment 9	T3	Dish	3	no	Inoculation 10 x 104 cells/mL algae	1	213713	219653	246716						226694	14363.8	8292.93	35684.5	22.6694	1.43638	3.56845
experiment 9	T3	Dish	3	no	Inoculation 10 x 104 cells/mL algae	2
experiment 9	T3	Dish	3	no	Inoculation 10 x 104 cells/mL algae	3	412574	369634	534245						438818	69717.5	40251.4	173202	43.8818	6.97175	17.3202
experiment 9	T3	Dish	3	no	Inoculation 10 x 104 cells/mL algae	4	473886	478984	588847						513906	53032.3	30618.2	131750	51.3906	5.30323	13.175
experiment 9	T4	Dish	3	no	Inoculation 20 x 104 cells/mL algae	0	942529	1.01224e+06	969078						974615	28726.9	16585.5	71367.4	97.4615	2.87269	7.13674
experiment 9	T4	Dish	3	no	Inoculation 20 x 104 cells/mL algae	1	733107	773884	687269						731420	35380.3	20426.9	87896.8	73.142	3.53803	8.78968
experiment 9	T4	Dish	3	no	Inoculation 20 x 104 cells/mL algae	2
experiment 9	T4	Dish	3	no	Inoculation 20 x 104 cells/mL algae	3	1.55107e+06	1.69518e+06	1.47377e+06						1.57334e+06	91753.2	52973.7	227946	157.334	9.17532	22.7946
experiment 9	T4	Dish	3	no	Inoculation 20 x 104 cells/mL algae	4	1.88418e+06	1.93273e+06	1.70728e+06						1.8414e+06	96882.4	55935.1	240689	184.14	9.68824	24.0689
standardized TC without grazing		Dish	8	no	see Riedl et al. 2018	0
standardized TC without grazing		Dish	8	no	see Riedl et al. 2018	1	209940	203564	226781	228416	222040	203564	265859	230706	223859	18911.1	6686.08	15812.6	22.3859	1.89111	1.58126
standardized TC without grazing		Dish	8	no	see Riedl et al. 2018	2
standardized TC without grazing		Dish	8	no	see Riedl et al. 2018	3
standardized TC without grazing		Dish	8	no	see Riedl et al. 2018	4	823411	879003	938192	883418	874098	979068	976942	990186	918040	57460	20315.2	48045.4	91.804	5.746	4.80454
standardized TC without grazing		Dish	8	no	see Riedl et al. 2018	5	1890445	1938679	1953231	1858071	1890281	2019614	1874748	2154505	1.94745e+06	92183.1	32591.7	77079.3	194.745	9.21831	7.70793
standardized TC without grazing		Dish	8	no	see Riedl et al. 2018	6	1996233	2262582	2211896	2316048	2218926	2129162	2357252	2420365	2239058	125253	44283.7	104731	223.906	12.5253	10.4731
standardized TC without grazing		Dish	8	no	see Riedl et al. 2018	7	3058034	3066863	3000644	3084358	2980860	3087955	3102671	3267647	3081129	81069.9	28662.5	67786.9	308.113	8.10699	6.77869
standardized TC without grazing		Dish	8	no	see Riedl et al. 2018	8	3524023	3586482	3883407	3929843	4002112	4204041	4442267	4546093	4.01478e+06	344560	121820	288105	401.478	34.456	28.8105
					Riedl V, Agatz A, Benstead R, Ashauer R. 2018. A standardized tritrophic small-scale system (TriCosm) for the assessment of stressor-induced effects on aquatic community dynamics. Environ. Toxicol. Chem. 37:1051–1060. doi:10.1002/etc.4032.

## Sheet: pH values
Experiment	Treatment	Vessel	Replicates	Test condition	day	pH Replicate 1	pH Replicate 2	pH Replicate 3	pH Replicate 4	pH Replicate 5	pH Replicate 6	pH Replicate 7	pH Replicate 8	average	std dev	std error	95% C.I (=std.error*z(n-f))
experiment 4	Blank	Dish	1	60 par first 24h, then 16 par 12/12h, pre-adapted algae	0	6.99								6.99
experiment 4	Blank	Dish	1	60 par first 24h, then 16 par 12/12h, pre-adapted algae	1
experiment 4	Blank	Dish	1	60 par first 24h, then 16 par 12/12h, pre-adapted algae	2
experiment 4	Blank	Dish	1	60 par first 24h, then 16 par 12/12h, pre-adapted algae	3
experiment 4	Blank	Dish	1	60 par first 24h, then 16 par 12/12h, pre-adapted algae	4
experiment 4	Blank	Dish	1	60 par first 24h, then 16 par 12/12h, pre-adapted algae	5	5.72								5.72
experiment 8	Blank	Dish	1		0	7.08								7.08
experiment 8	Blank	Dish	1		1
experiment 8	Blank	Dish	1		2
experiment 8	Blank	Dish	1		3
experiment 8	Blank	Dish	1		4
experiment 8	Blank	Dish	1		5	6.81								6.81
experiment 9	Blank	Dish	1		0	7.07								7.07
experiment 9	Blank	Dish	1		1
experiment 9	Blank	Dish	1		2
experiment 9	Blank	Dish	1		3
experiment 9	Blank	Dish	1		4	6.67								6.67
experiment 15	Blank T1	Dish	1	0.23 g/L Na2SiO3	0	7.34								7.34
experiment 15	Blank T1	Dish	1	0.23 g/L Na2SiO3	1
experiment 15	Blank T1	Dish	1	0.23 g/L Na2SiO3	2
experiment 15	Blank T1	Dish	1	0.23 g/L Na2SiO3	3
experiment 15	Blank T1	Dish	1	0.23 g/L Na2SiO3	4
experiment 15	Blank T1	Dish	1	0.23 g/L Na2SiO3	5
experiment 15	Blank T1	Dish	1	0.23 g/L Na2SiO3	6	6.47								6.47
experiment 16	Blank T1	Dish	3	0.23 g/L Na2SiO3, pH adjustment with HCl	-2
experiment 16	Blank T1	Dish	3	0.23 g/L Na2SiO3, pH adjustment with HCl	-1
experiment 16	Blank T1	Dish	3	0.23 g/L Na2SiO3, pH adjustment with HCl	0	7.05	7.05	7.05						7.05	0	0	0
experiment 16	Blank T1	Dish	3	0.23 g/L Na2SiO3, pH adjustment with HCl	1	7.9	8.06	8.09						8.01667	0.102144	0.0589727	0.253759
experiment 16	Blank T1	Dish	3	0.23 g/L Na2SiO3, pH adjustment with HCl	2	7.9	8.07	8.07						8.01333	0.0981495	0.0566667	0.243837
experiment 16	Blank T1	Dish	3	0.23 g/L Na2SiO3, pH adjustment with HCl	3	8.04	8.13	8.15						8.10667	0.0585947	0.0338296	0.145569
experiment 16	Blank T1	Dish	3	0.23 g/L Na2SiO3, pH adjustment with HCl	4												0
experiment 18	Blank T1	Dish	3	Initial pH 6.0, pH adjustment with HCl	0	6.05	6.05	6.05						6.05	0	0	0
experiment 18	Blank T1	Dish	3	Initial pH 6.0, pH adjustment with HCl	1	5.89	6.07	6.01						5.99	0.0916515	0.052915	0.227693
experiment 18	Blank T1	Dish	3	Initial pH 6.0, pH adjustment with HCl	2	5.74	6.03	5.88						5.88333	0.145029	0.0837324	0.3603
experiment 18	Blank T1	Dish	3	Initial pH 6.0, pH adjustment with HCl	3	5.86	6.2	5.99						6.01667	0.171561	0.0990511	0.426217
experiment 18	Blank T1	Dish	3	Initial pH 6.0, pH adjustment with HCl	4	6.05	6.18	5.72						5.98333	0.237136	0.13691	0.589125
experiment 19	Blank T1	Dish	1	no pH adjustment with HCl, only aeration	-2	9.2								9.2
experiment 19	Blank T1	Dish	1	no pH adjustment with HCl, only aeration	-1
experiment 19	Blank T1	Dish	1	no pH adjustment with HCl, only aeration	0	7.1								7.1
experiment 19	Blank T1	Dish	1	no pH adjustment with HCl, only aeration	1
experiment 19	Blank T1	Dish	1	no pH adjustment with HCl, only aeration	2
experiment 19	Blank T1	Dish	1	no pH adjustment with HCl, only aeration	3	7.29								7.29
experiment 19	Blank T1	Dish	1	no pH adjustment with HCl, only aeration	4
experiment 19	Blank T1	Dish	1	no pH adjustment with HCl, only aeration	5	6.95								6.95
experiment 19	Blank T1	Dish	1	no pH adjustment with HCl, only aeration	6
experiment 19	Blank T1	Dish	1	no pH adjustment with HCl, only aeration	7	7.24								7.24
experiment 16	Blank T2	Dish	3	0.23 g/L Na2SiO3, pH adjustment with aeration	-2	10.81								10.81
experiment 16	Blank T2	Dish	3	0.23 g/L Na2SiO3, pH adjustment with aeration	-1	9.78								9.78
experiment 16	Blank T2	Dish	3	0.23 g/L Na2SiO3, pH adjustment with aeration	0	8.45	8.45	8.45						8.45	0	0	0
experiment 16	Blank T2	Dish	3	0.23 g/L Na2SiO3, pH adjustment with aeration	1	8.24	8.28	8.27						8.26333	0.0208168	0.0120186	0.051716
experiment 16	Blank T2	Dish	3	0.23 g/L Na2SiO3, pH adjustment with aeration	2	8.18	8.2	8.2						8.19333	0.011547	0.00666667	0.0286867
experiment 16	Blank T2	Dish	3	0.23 g/L Na2SiO3, pH adjustment with aeration	3	8.26	8.27	8.24						8.25667	0.0152757	0.00881942	0.03795
experiment 16	Blank T2	Dish	3	0.23 g/L Na2SiO3, pH adjustment with aeration	4												0
experiment 18	Blank T2	Dish	3	Initial pH 6.5, pH adjustment with HCl	0	6.57	6.57	6.57						6.57	0	0	0
experiment 18	Blank T2	Dish	3	Initial pH 6.5, pH adjustment with HCl	1	6.23	6.25	6.23						6.23667	0.011547	0.00666667	0.0286867
experiment 18	Blank T2	Dish	3	Initial pH 6.5, pH adjustment with HCl	2	6.09	6.2	6.2						6.16333	0.0635085	0.0366667	0.157777
experiment 18	Blank T2	Dish	3	Initial pH 6.5, pH adjustment with HCl	3	6.17	6.16	6.2						6.17667	0.0208167	0.0120185	0.0517156
experiment 18	Blank T2	Dish	3	Initial pH 6.5, pH adjustment with HCl	4	6.12	6.25	6.24						6.20333	0.0723418	0.0417665	0.179721
experiment 18	Blank T3	Dish	3	Initial pH 7.0, pH adjustment with HCl	0	7.03	7.03	7.03						7.03	0	0	0
experiment 18	Blank T3	Dish	3	Initial pH 7.0, pH adjustment with HCl	1	6.48	6.53	6.46						6.49	0.0360555	0.0208167	0.0895741
experiment 18	Blank T3	Dish	3	Initial pH 7.0, pH adjustment with HCl	2	6.42	6.4	6.45						6.42333	0.0251661	0.0145297	0.0625211
experiment 18	Blank T3	Dish	3	Initial pH 7.0, pH adjustment with HCl	3	6.35	6.38	6.27						6.33333	0.0568624	0.0328295	0.141265
experiment 18	Blank T3	Dish	3	Initial pH 7.0, pH adjustment with HCl	4	6.39	6.5	6.46						6.45	0.0556776	0.0321455	0.138322
experiment 18	Blank T4	Dish	3	Initial pH 7.5, pH adjustment with HCl	0	7.5	7.5	7.5						7.5	0	0	0
experiment 18	Blank T4	Dish	3	Initial pH 7.5, pH adjustment with HCl	1	6.57	6.65	6.7						6.64	0.0655744	0.0378594	0.162909
experiment 18	Blank T4	Dish	3	Initial pH 7.5, pH adjustment with HCl	2	6.53	6.62	6.63						6.59333	0.0550757	0.031798	0.136827
experiment 18	Blank T4	Dish	3	Initial pH 7.5, pH adjustment with HCl	3	6.66	6.65	6.64						6.65	0.01	0.0057735	0.0248434
experiment 18	Blank T4	Dish	3	Initial pH 7.5, pH adjustment with HCl	4	6.71	6.75	6.76						6.74	0.0264575	0.0152753	0.0657294
experiment 18	Blank T5	Dish	3	Initial pH 8.0, pH adjustment with HCl	0	8.03	8.03	8.03						8.03	0	0	0
experiment 18	Blank T5	Dish	3	Initial pH 8.0, pH adjustment with HCl	1	6.74	6.75	6.84						6.77667	0.0550757	0.031798	0.136827
experiment 18	Blank T5	Dish	3	Initial pH 8.0, pH adjustment with HCl	2	6.69	6.67	6.65						6.67	0.02	0.011547	0.0496868
experiment 18	Blank T5	Dish	3	Initial pH 8.0, pH adjustment with HCl	3	6.6	6.61	6.6						6.60333	0.0057735	0.00333333	0.0143433
experiment 18	Blank T5	Dish	3	Initial pH 8.0, pH adjustment with HCl	4	6.85	6.76	6.73						6.78	0.06245	0.0360555	0.155147
experiment 18	Blank T6	Dish	3	no HCl, pH adjustment with aeration	0	6.36	6.36	6.36						6.36	0	0	0
experiment 18	Blank T6	Dish	3	no HCl, pH adjustment with aeration	1	6.47	6.41	6.48						6.45333	0.0378594	0.0218581	0.0940555
experiment 18	Blank T6	Dish	3	no HCl, pH adjustment with aeration	2	6.24	6.24	6.23						6.23667	0.0057735	0.00333333	0.0143433
experiment 18	Blank T6	Dish	3	no HCl, pH adjustment with aeration	3	6.79	6.66	6.59						6.68	0.101489	0.0585947	0.252133
experiment 18	Blank T6	Dish	3	no HCl, pH adjustment with aeration	4	6.49	6.55	6.55						6.53	0.034641	0.02	0.08606
experiment 1	T1	Dish	3	T82MV, 65 rpm, 25 ± 1°C, 12/12h light/dark, ca. 16 par	0	7.2	7.2	7.2						7.2	0	0	0
experiment 1	T1	Dish	3	T82MV, 65 rpm, 25 ± 1°C, 12/12h light/dark, ca. 16 par	1
experiment 1	T1	Dish	3	T82MV, 65 rpm, 25 ± 1°C, 12/12h light/dark, ca. 16 par	2
experiment 1	T1	Dish	3	T82MV, 65 rpm, 25 ± 1°C, 12/12h light/dark, ca. 16 par	3
experiment 1	T1	Dish	3	T82MV, 65 rpm, 25 ± 1°C, 12/12h light/dark, ca. 16 par	4	7.17	6.96	6.89						7.00667	0.145717	0.0841295	0.362009
experiment 10	T1	Dish	3	Inoculation 2 x 104 cells/mL algae	0	7.07	7.07	7.07						7.07	0	0	0
experiment 10	T1	Dish	3	Inoculation 2 x 104 cells/mL algae	1
experiment 10	T1	Dish	3	Inoculation 2 x 104 cells/mL algae	2
experiment 10	T1	Dish	3	Inoculation 2 x 104 cells/mL algae	3
experiment 10	T1	Dish	3	Inoculation 2 x 104 cells/mL algae	4
experiment 10	T1	Dish	3	Inoculation 2 x 104 cells/mL algae	5	6.08	6.15	6.23						6.15333	0.0750555	0.0433333	0.186463
experiment 11	T1	Dish	3	Inoculation 2 x 104 cells/mL algae	0	7.07	7.07	7.07						7.07	0	0	0
experiment 11	T1	Dish	3	Inoculation 2 x 104 cells/mL algae	1
experiment 11	T1	Dish	3	Inoculation 2 x 104 cells/mL algae	2
experiment 11	T1	Dish	3	Inoculation 2 x 104 cells/mL algae	3
experiment 11	T1	Dish	3	Inoculation 2 x 104 cells/mL algae	4	6.4	6.4	6.56						6.45333	0.092376	0.0533333	0.229493
experiment 12	T1	Dish	3	Regular metal concentration, 0.05 ml/L	0	6.96	6.96	6.96						6.96	0	0	0
experiment 12	T1	Dish	3	Regular metal concentration, 0.05 ml/L	1
experiment 12	T1	Dish	3	Regular metal concentration, 0.05 ml/L	3
experiment 12	T1	Dish	3	Regular metal concentration, 0.05 ml/L	5	6.3	6.22	6.1						6.20667	0.100664	0.0581187	0.250085
experiment 13	T1	Dish	1	Trace metals with dinitrolo EDTA	0	no pH measurement
experiment 13	T1	Dish	1	Trace metals with dinitrolo EDTA	1
experiment 13	T1	Dish	1	Trace metals with dinitrolo EDTA	2
experiment 13	T1	Dish	1	Trace metals with dinitrolo EDTA	3
experiment 13	T1	Dish	1	Trace metals with dinitrolo EDTA	4
experiment 13	T1	Dish	1	Trace metals with dinitrolo EDTA	5
experiment 14	T1	Dish	3	Inoculation 2 x 104 cells/mL algae	0	7.07	7.07	7.07						7.07	0	0	0
experiment 14	T1	Dish	3	Inoculation 2 x 104 cells/mL algae	1
experiment 14	T1	Dish	3	Inoculation 2 x 104 cells/mL algae	2
experiment 14	T1	Dish	3	Inoculation 2 x 104 cells/mL algae	3
experiment 14	T1	Dish	3	Inoculation 2 x 104 cells/mL algae	4	7.09	7.13	7.11						7.11	0.02	0.011547	0.0496868
experiment 15	T1	Dish	3	0.23 g/L Na2SiO3	0	7.4	7.4	7.4						7.4	1.08779e-15	6.28037e-16	2.70244e-15
experiment 15	T1	Dish	3	0.23 g/L Na2SiO3	1
experiment 15	T1	Dish	3	0.23 g/L Na2SiO3	2
experiment 15	T1	Dish	3	0.23 g/L Na2SiO3	3
experiment 15	T1	Dish	3	0.23 g/L Na2SiO3	4
experiment 15	T1	Dish	3	0.23 g/L Na2SiO3	5
experiment 15	T1	Dish	3	0.23 g/L Na2SiO3	6	6.62	6.66	6.69						6.65667	0.0351188	0.0202759	0.0872471
experiment 16	T1	Dish	3	0.23 g/L Na2SiO3, pH adjustment with HCl	0	7.05	7.05	7.05						7.05	0	0	0
experiment 16	T1	Dish	3	0.23 g/L Na2SiO3, pH adjustment with HCl	1	8.06	8.1	8.16						8.10667	0.0503322	0.0290593	0.125042
experiment 16	T1	Dish	3	0.23 g/L Na2SiO3, pH adjustment with HCl	2	8.2	8.18	8.18						8.18667	0.011547	0.00666667	0.0286867
experiment 16	T1	Dish	3	0.23 g/L Na2SiO3, pH adjustment with HCl	3	8.19	8.22	8.23						8.21333	0.0208167	0.0120185	0.0517156
experiment 16	T1	Dish	3	0.23 g/L Na2SiO3, pH adjustment with HCl	4
experiment 17	T1	Dish	3	0.05 g/L Na2SiO3, pH adjustment with aeration and HCl	0	7.3	7.3	7.3						7.3	0	0	0
experiment 17	T1	Dish	3	0.05 g/L Na2SiO3, pH adjustment with aeration and HCl	1	7.3	7.3	7.3						7.3	0	0	0
experiment 17	T1	Dish	3	0.05 g/L Na2SiO3, pH adjustment with aeration and HCl	2												0
experiment 17	T1	Dish	3	0.05 g/L Na2SiO3, pH adjustment with aeration and HCl	3	7.4	7.3	7.4						7.36667	0.057735	0.0333333	0.143433
experiment 17	T1	Dish	3	0.05 g/L Na2SiO3, pH adjustment with aeration and HCl	4												0
experiment 17	T1	Dish	3	0.05 g/L Na2SiO3, pH adjustment with aeration and HCl	5	7.9	7.9	7.9						7.9	1.08779e-15	6.28037e-16	2.70244e-15
experiment 18	T1	Dish	3	Initial pH 6.0, pH adjustment with HCl	0	6.05	6.05	6.05						6.05	0	0	0
experiment 18	T1	Dish	3	Initial pH 6.0, pH adjustment with HCl	1	6.06	6.03	6.02						6.03667	0.0208167	0.0120185	0.0517156
experiment 18	T1	Dish	3	Initial pH 6.0, pH adjustment with HCl	2	6.54	6.7	6.45						6.56333	0.126623	0.0731057	0.314574
experiment 18	T1	Dish	3	Initial pH 6.0, pH adjustment with HCl	3	6.25	6.17	6.14						6.18667	0.0568624	0.0328295	0.141265
experiment 18	T1	Dish	3	Initial pH 6.0, pH adjustment with HCl	4	6.37	6.38	6.27						6.34	0.0608276	0.0351188	0.151116
experiment 19	T1	Dish	3	no pH adjustment with HCl, only aeration	0	7.1	7.1	7.1						7.1	1.08779e-15	6.28037e-16	2.70244e-15
experiment 19	T1	Dish	3	no pH adjustment with HCl, only aeration	1
experiment 19	T1	Dish	3	no pH adjustment with HCl, only aeration	2
experiment 19	T1	Dish	3	no pH adjustment with HCl, only aeration	3	7.2	7.27	7.26						7.24333	0.0378594	0.0218581	0.0940555
experiment 19	T1	Dish	3	no pH adjustment with HCl, only aeration	4
experiment 19	T1	Dish	3	no pH adjustment with HCl, only aeration	5	7.18	7.18	7.23						7.19667	0.0288675	0.0166667	0.0717167
experiment 19	T1	Dish	3	no pH adjustment with HCl, only aeration	6
experiment 19	T1	Dish	1	no pH adjustment with HCl, only aeration	7	7.74	7.65	7.71						7.7	0.0458258	0.0264575	0.113847
experiment 2	T1	Dish	3	12/12h light/dark, ca. 16 par	0	7.11	7.11	7.11						7.11	0	0	0
experiment 2	T1	Dish	3	12/12h light/dark, ca. 16 par	1
experiment 2	T1	Dish	3	12/12h light/dark, ca. 16 par	2
experiment 2	T1	Dish	3	12/12h light/dark, ca. 16 par	3
experiment 2	T1	Dish	3	12/12h light/dark, ca. 16 par	4
experiment 2	T1	Dish	3	12/12h light/dark, ca. 16 par	5	7.15	7.04	7.01						7.06667	0.0737111	0.0425572	0.183123
experiment 20	T1	Dish	3	Na2SiO3 0.02 g/L, pH adjustment with aeration	0	7.1	7.1	7.1						7.1	1.08779e-15	6.28037e-16	2.70244e-15
experiment 20	T1	Dish	3	Na2SiO3 0.02 g/L, pH adjustment with aeration	1
experiment 20	T1	Dish	3	Na2SiO3 0.02 g/L, pH adjustment with aeration	2
experiment 20	T1	Dish	3	Na2SiO3 0.02 g/L, pH adjustment with aeration	3
experiment 20	T1	Dish	3	Na2SiO3 0.02 g/L, pH adjustment with aeration	4
experiment 20	T1	Dish	3	Na2SiO3 0.02 g/L, pH adjustment with aeration	5
experiment 20	T1	Dish	3	Na2SiO3 0.02 g/L, pH adjustment with aeration	6	7.9	7.9	7.9						7.9	1.08779e-15	6.28037e-16	2.70244e-15
experiment 20	T1	Dish	3	Na2SiO3 0.02 g/L, pH adjustment with aeration	7
experiment 20	T1	Dish	3	Na2SiO3 0.02 g/L, pH adjustment with aeration	8	8.5	8.6	8.6						8.56667	0.057735	0.0333333	0.143433
experiment 20	T2- blank	Dish	3	NaHCO3 0.04 g/L, pH adjustment with aeration	0	7.6	7.6	7.6
experiment 20	T1-blank	Dish	3	Na2SiO3 0.02 g/L, pH adjustment with aeration	0	7.1	7.1	7.1
experiment 3	T1	Dish	3	60 par first 24h, then 16 par 12/12h	0	7.14	7.14	7.14						7.14	0	0	0
experiment 3	T1	Dish	3	60 par first 24h, then 16 par 12/12h	1
experiment 3	T1	Dish	3	60 par first 24h, then 16 par 12/12h	2
experiment 3	T1	Dish	3	60 par first 24h, then 16 par 12/12h	3
experiment 3	T1	Dish	3	60 par first 24h, then 16 par 12/12h	4	7.23	7.32	7.39						7.31333	0.0802081	0.0463081	0.199264
experiment 4	T1	Dish	3	60 par first 24h, then 16 par 12/12h, pre-adapted algae	0	6.99	6.99	6.99						6.99	1.08779e-15	6.28037e-16	2.70244e-15
experiment 4	T1	Dish	3	60 par first 24h, then 16 par 12/12h, pre-adapted algae	1
experiment 4	T1	Dish	3	60 par first 24h, then 16 par 12/12h, pre-adapted algae	2
experiment 4	T1	Dish	3	60 par first 24h, then 16 par 12/12h, pre-adapted algae	3
experiment 4	T1	Dish	3	60 par first 24h, then 16 par 12/12h, pre-adapted algae	4
experiment 4	T1	Dish	3	60 par first 24h, then 16 par 12/12h, pre-adapted algae	5	6.43	6.5	6.57						6.5	0.07	0.0404145	0.173904
experiment 5	T1	Dish	3	300 par first 24h, then ca. 16 par	0	7.03667	7.03667	7.03667						7.03667	1.08779e-15	6.28037e-16	2.70244e-15
experiment 5	T1	Dish	3	300 par first 24h, then ca. 16 par	1
experiment 5	T1	Dish	3	300 par first 24h, then ca. 16 par	2
experiment 5	T1	Dish	3	300 par first 24h, then ca. 16 par	3
experiment 5	T1	Dish	3	300 par first 24h, then ca. 16 par	4	6.75	6.65	6.82						6.74	0.08544	0.0493288	0.212262
experiment 6	T1	Dish	3	Inoculation 2 x 104 cells/mL algae	0	6.52	6.52	6.52						6.52	0	0	0
experiment 6	T1	Dish	3	Inoculation 2 x 104 cells/mL algae	1
experiment 6	T1	Dish	3	Inoculation 2 x 104 cells/mL algae	2
experiment 6	T1	Dish	3	Inoculation 2 x 104 cells/mL algae	3
experiment 6	T1	Dish	3	Inoculation 2 x 104 cells/mL algae	4	6.59	6.76	6.5						6.61667	0.132035	0.0762306	0.32802
experiment 6	T1	Dish	3	Inoculation 2 x 104 cells/mL algae	5
experiment 7	T1	Dish	3	Newly purchased dishes	0	pH not measured
experiment 7	T1	Dish	3	Newly purchased dishes	1
experiment 7	T1	Dish	3	Newly purchased dishes	2
experiment 7	T1	Dish	3	Newly purchased dishes	3
experiment 7	T1	Dish	3	Newly purchased dishes	4
experiment 8	T1	Dish	3	Inoculation 2 x 104 cells/mL algae	0	7.08	7.08	7.08						7.08	1.08779e-15	6.28037e-16	2.70244e-15
experiment 8	T1	Dish	3	Inoculation 2 x 104 cells/mL algae	1
experiment 8	T1	Dish	3	Inoculation 2 x 104 cells/mL algae	2
experiment 8	T1	Dish	3	Inoculation 2 x 104 cells/mL algae	3
experiment 8	T1	Dish	3	Inoculation 2 x 104 cells/mL algae	4
experiment 8	T1	Dish	3	Inoculation 2 x 104 cells/mL algae	5	6.92	6.99	7						6.97	0.043589	0.0251661	0.10829
experiment 9	T1	Dish	3	Inoculation 2 x 104 cells/mL algae	0	7.07	7.07	7.07						7.07
experiment 9	T1	Dish	3	Inoculation 2 x 104 cells/mL algae	1
experiment 9	T1	Dish	3	Inoculation 2 x 104 cells/mL algae	2
experiment 9	T1	Dish	3	Inoculation 2 x 104 cells/mL algae	3
experiment 9	T1	Dish	3	Inoculation 2 x 104 cells/mL algae	4	6.76	6.86	6.92						6.84667	0.080829	0.0466667	0.200807
experiment 20	T1-blank	Dish	3	Na2SiO3 0.02 g/L, pH adjustment with aeration	6	7.9	7.9	7.9						7.9	1.08779e-15	6.28037e-16	2.70244e-15
experiment 20	T1-blank	Dish	3	Na2SiO3 0.02 g/L, pH adjustment with aeration	8	8.5	8.6	8.6						8.56667	0.057735	0.0333333	0.143433
experiment 1	T2	Dish	3	T82MV, 150 rpm, 23 ± 1°C, 24h light, 60 – 80 par	0	7.2	7.2	7.2						7.2	0	0	0
experiment 1	T2	Dish	3	T82MV, 150 rpm, 23 ± 1°C, 24h light, 60 – 80 par	1
experiment 1	T2	Dish	3	T82MV, 150 rpm, 23 ± 1°C, 24h light, 60 – 80 par	2
experiment 1	T2	Dish	3	T82MV, 150 rpm, 23 ± 1°C, 24h light, 60 – 80 par	3
experiment 1	T2	Dish	3	T82MV, 150 rpm, 23 ± 1°C, 24h light, 60 – 80 par	4	8.97	8.72	8.69						8.79333	0.153731	0.0887568	0.381921
experiment 10	T2	Dish	3	Inoculation 5 x 104 cells/mL algae	0	7.01	7.01	7.01						7.01	1.08779e-15	6.28037e-16	2.70244e-15
experiment 10	T2	Dish	3	Inoculation 5 x 104 cells/mL algae	1
experiment 10	T2	Dish	3	Inoculation 5 x 104 cells/mL algae	2
experiment 10	T2	Dish	3	Inoculation 5 x 104 cells/mL algae	3
experiment 10	T2	Dish	3	Inoculation 5 x 104 cells/mL algae	4
experiment 10	T2	Dish	3	Inoculation 5 x 104 cells/mL algae	5	6.49	6.51	6.55						6.51667	0.0305505	0.0176383	0.0758978
experiment 11	T2	Dish	3	Inoculation 10 x 104 cells/mL algae	0	7.07	7.07	7.07						7.07	0	0	0
experiment 11	T2	Dish	3	Inoculation 10 x 104 cells/mL algae	1
experiment 11	T2	Dish	3	Inoculation 10 x 104 cells/mL algae	2
experiment 11	T2	Dish	3	Inoculation 10 x 104 cells/mL algae	3
experiment 11	T2	Dish	3	Inoculation 10 x 104 cells/mL algae	4	6.71	6.56	6.67						6.64667	0.0776745	0.0448454	0.19297
experiment 12	T2	Dish	3	Twofold metal concentration, 0.10 ml/L	0	6.96	6.96	6.96						6.96	0	0	0
experiment 12	T2	Dish	3	Twofold metal concentration, 0.10 ml/L	1
experiment 12	T2	Dish	3	Twofold metal concentration, 0.10 ml/L	3
experiment 12	T2	Dish	3	Twofold metal concentration, 0.10 ml/L	5	6.42	6.4	6.38						6.4	0.02	0.011547	0.0496868
experiment 13	T2	Dish	1	Trace metals with disodium EDTA	0	no pH measurement
experiment 13	T2	Dish	1	Trace metals with disodium EDTA	1
experiment 13	T2	Dish	1	Trace metals with disodium EDTA	2
experiment 13	T2	Dish	1	Trace metals with disodium EDTA	3
experiment 13	T2	Dish	1	Trace metals with disodium EDTA	4
experiment 13	T2	Dish	1	Trace metals with disodium EDTA	5
experiment 14	T2	Dish	3	Inoculation 10 x 104 cells/mL algae	0	7.07	7.07	7.07						7.07	0	0	0
experiment 14	T2	Dish	3	Inoculation 10 x 104 cells/mL algae	1
experiment 14	T2	Dish	3	Inoculation 10 x 104 cells/mL algae	2
experiment 14	T2	Dish	3	Inoculation 10 x 104 cells/mL algae	3
experiment 14	T2	Dish	3	Inoculation 10 x 104 cells/mL algae	4	7.2	7.25	7.21						7.22	0.0264575	0.0152753	0.0657294
experiment 16	T2	Dish	3	0.23 g/L Na2SiO3, pH adjustment with aeration	0	8.45	8.45	8.45						8.45	0	0	0
experiment 16	T2	Dish	3	0.23 g/L Na2SiO3, pH adjustment with aeration	1	8.26	8.28	8.3						8.28	0.02	0.011547	0.0496868
experiment 16	T2	Dish	3	0.23 g/L Na2SiO3, pH adjustment with aeration	2	8.23	8.26	8.27						8.25333	0.0208171	0.0120187	0.0517166
experiment 16	T2	Dish	3	0.23 g/L Na2SiO3, pH adjustment with aeration	3	8.27	8.29	8.29						8.28333	0.0115464	0.00666633	0.0286852
experiment 16	T2	Dish	3	0.23 g/L Na2SiO3, pH adjustment with aeration	4
experiment 18	T2	Dish	3	Initial pH 6.5, pH adjustment with HCl	0	6.57	6.57	6.57						6.57	0	0	0
experiment 18	T2	Dish	3	Initial pH 6.5, pH adjustment with HCl	1	6.26	6.29	6.28						6.27667	0.0152753	0.00881917	0.0379489
experiment 18	T2	Dish	3	Initial pH 6.5, pH adjustment with HCl	2	6.49	6.47	6.39						6.45	0.052915	0.0305505	0.131459
experiment 18	T2	Dish	3	Initial pH 6.5, pH adjustment with HCl	3	6.31	6.31	6.3						6.30667	0.0057735	0.00333333	0.0143433
experiment 18	T2	Dish	3	Initial pH 6.5, pH adjustment with HCl	4	6.27	6.26	6.19						6.24	0.043589	0.0251661	0.10829
experiment 2	T2	Dish	3	12/12h light/dark, 60 – 80 par	0	7.11	7.11	7.11						7.11	0	0	0
experiment 2	T2	Dish	3	12/12h light/dark, 60 – 80 par	1
experiment 2	T2	Dish	3	12/12h light/dark, 60 – 80 par	2
experiment 2	T2	Dish	3	12/12h light/dark, 60 – 80 par	3
experiment 2	T2	Dish	3	12/12h light/dark, 60 – 80 par	4
experiment 2	T2	Dish	3	12/12h light/dark, 60 – 80 par	5	7.14	7.64	7.65						7.47667	0.291605	0.168358	0.724445
experiment 20	T2	Dish	3	NaHCO3 0.04 g/L, pH adjustment with aeration	0	7.6	7.6	7.6						7.6	1.08779e-15	6.28037e-16	2.70244e-15
experiment 20	T2	Dish	3	NaHCO3 0.04 g/L, pH adjustment with aeration	1
experiment 20	T2	Dish	3	NaHCO3 0.04 g/L, pH adjustment with aeration	2
experiment 20	T2	Dish	3	NaHCO3 0.04 g/L, pH adjustment with aeration	3
experiment 20	T2	Dish	3	NaHCO3 0.04 g/L, pH adjustment with aeration	4
experiment 20	T2	Dish	3	NaHCO3 0.04 g/L, pH adjustment with aeration	5
experiment 20	T2	Dish	3	NaHCO3 0.04 g/L, pH adjustment with aeration	6	7.9	8	8.1						8	0.1	0.057735	0.248434
experiment 20	T2	Dish	3	NaHCO3 0.04 g/L, pH adjustment with aeration	7
experiment 20	T2	Dish	3	NaHCO3 0.04 g/L, pH adjustment with aeration	8	8.4	8.3	8.4						8.36667	0.057735	0.0333333	0.143433
experiment 3	T2	Flask	3	60 par first 24h, then 16 par 12/12h	0	7.14	7.14	7.14						7.14	0	0	0
experiment 3	T2	Flask	3	60 par first 24h, then 16 par 12/12h	1
experiment 3	T2	Flask	3	60 par first 24h, then 16 par 12/12h	2
experiment 3	T2	Flask	3	60 par first 24h, then 16 par 12/12h	3
experiment 3	T2	Flask	3	60 par first 24h, then 16 par 12/12h	4	6.85	6.96	7.07						6.96	0.11	0.0635085	0.273277
experiment 4	T2	Flask	3	60 par first 24h, then 16 par 12/12h, pre-adapted algae	0	6.99	6.99	6.99						6.99	1.08779e-15	6.28037e-16	2.70244e-15
experiment 4	T2	Flask	3	60 par first 24h, then 16 par 12/12h, pre-adapted algae	1
experiment 4	T2	Flask	3	60 par first 24h, then 16 par 12/12h, pre-adapted algae	2
experiment 4	T2	Flask	3	60 par first 24h, then 16 par 12/12h, pre-adapted algae	3
experiment 4	T2	Flask	3	60 par first 24h, then 16 par 12/12h, pre-adapted algae	4
experiment 4	T2	Flask	3	60 par first 24h, then 16 par 12/12h, pre-adapted algae	5	6.8	6.74	6.81						6.78333	0.0378594	0.0218581	0.0940555
experiment 5	T2	Flask	3	300 par first 24h, then ca. 16 par	0	7.03667	7.03667	7.03667						7.03667	1.08779e-15	6.28037e-16	2.70244e-15
experiment 5	T2	Flask	3	300 par first 24h, then ca. 16 par	1
experiment 5	T2	Flask	3	300 par first 24h, then ca. 16 par	2
experiment 5	T2	Flask	3	300 par first 24h, then ca. 16 par	3
experiment 5	T2	Flask	3	300 par first 24h, then ca. 16 par	4	6.3	6.45	6.56						6.43667	0.130512	0.075351	0.324235
experiment 6	T2	Dish	3	Inoculation 5 x 104 cells/mL algae	0	6.52	6.52	6.52						6.52	0	0	0
experiment 6	T2	Dish	3	Inoculation 5 x 104 cells/mL algae	1
experiment 6	T2	Dish	3	Inoculation 5 x 104 cells/mL algae	2
experiment 6	T2	Dish	3	Inoculation 5 x 104 cells/mL algae	3
experiment 6	T2	Dish	3	Inoculation 5 x 104 cells/mL algae	4	6.73	6.78	6.86						6.79	0.0655744	0.0378594	0.162909
experiment 6	T2	Dish	3	Inoculation 5 x 104 cells/mL algae	5
experiment 7	T2	Flask	3	Flasks used for previous tests	0	pH not measured
experiment 7	T2	Flask	3	Flasks used for previous tests	1
experiment 7	T2	Flask	3	Flasks used for previous tests	2
experiment 7	T2	Flask	3	Flasks used for previous tests	3
experiment 7	T2	Flask	3	Flasks used for previous tests	4
experiment 8	T2	Dish	3	Inoculation 5 x 104 cells/mL algae	0	7.08	7.08	7.08						7.08	1.08779e-15	6.28037e-16	2.70244e-15
experiment 8	T2	Dish	3	Inoculation 5 x 104 cells/mL algae	1
experiment 8	T2	Dish	3	Inoculation 5 x 104 cells/mL algae	2
experiment 8	T2	Dish	3	Inoculation 5 x 104 cells/mL algae	3
experiment 8	T2	Dish	3	Inoculation 5 x 104 cells/mL algae	4
experiment 8	T2	Dish	3	Inoculation 5 x 104 cells/mL algae	5	7.07	7.19	7.1						7.12	0.06245	0.0360555	0.155147
experiment 9	T2	Dish	3	Inoculation 5 x 104 cells/mL algae	0	7.07	7.07	7.07						7.07	0	0	0
experiment 9	T2	Dish	3	Inoculation 5 x 104 cells/mL algae	1
experiment 9	T2	Dish	3	Inoculation 5 x 104 cells/mL algae	2
experiment 9	T2	Dish	3	Inoculation 5 x 104 cells/mL algae	3
experiment 9	T2	Dish	3	Inoculation 5 x 104 cells/mL algae	4	7.05	7.05	7.09						7.06333	0.023094	0.0133333	0.0573733
experiment 20	T2- blank	Dish	3	NaHCO3 0.04 g/L, pH adjustment with aeration	6	7.9	8	8.1						8	0.1	0.057735	0.248434
experiment 20	T2- blank	Dish	3	NaHCO3 0.04 g/L, pH adjustment with aeration	8	8.4	8.3	8.4						8.36667	0.057735	0.0333333	0.143433
experiment 1	T3	Flask	3	T82MV, 65 rpm, 25 ± 1°C, 12/12h light/dark, ca. 16 par	0	7.2	7.2	7.2						7.2	0	0	0
experiment 1	T3	Flask	3	T82MV, 65 rpm, 25 ± 1°C, 12/12h light/dark, ca. 16 par	1
experiment 1	T3	Flask	3	T82MV, 65 rpm, 25 ± 1°C, 12/12h light/dark, ca. 16 par	2
experiment 1	T3	Flask	3	T82MV, 65 rpm, 25 ± 1°C, 12/12h light/dark, ca. 16 par	3
experiment 1	T3	Flask	3	T82MV, 65 rpm, 25 ± 1°C, 12/12h light/dark, ca. 16 par	4	7.74	7.57	7.46						7.59	0.141067	0.0814453	0.350459
experiment 10	T3	Dish	3	Inoculation 10 x 104 cells/mL algae	0	7.01	7.01	7.01						7.01	1.08779e-15	6.28037e-16	2.70244e-15
experiment 10	T3	Dish	3	Inoculation 10 x 104 cells/mL algae	1
experiment 10	T3	Dish	3	Inoculation 10 x 104 cells/mL algae	2
experiment 10	T3	Dish	3	Inoculation 10 x 104 cells/mL algae	3
experiment 10	T3	Dish	3	Inoculation 10 x 104 cells/mL algae	4
experiment 10	T3	Dish	3	Inoculation 10 x 104 cells/mL algae	5	6.67	6.64	6.66						6.65667	0.0152753	0.00881917	0.0379489
experiment 11	T3	Dish	3	Inoculation 20 x 104 cells/mL algae	0	7.07	7.07	7.07						7.07	0	0	0
experiment 11	T3	Dish	3	Inoculation 20 x 104 cells/mL algae	1
experiment 11	T3	Dish	3	Inoculation 20 x 104 cells/mL algae	2
experiment 11	T3	Dish	3	Inoculation 20 x 104 cells/mL algae	3
experiment 11	T3	Dish	3	Inoculation 20 x 104 cells/mL algae	4	6.76	6.84	6.9						6.83333	0.0702377	0.0405518	0.174494
experiment 13	T3	Dish	1	Trace metals with tetrasodium EDTA	0	no pH measurement
experiment 13	T3	Dish	1	Trace metals with tetrasodium EDTA	1
experiment 13	T3	Dish	1	Trace metals with tetrasodium EDTA	2
experiment 13	T3	Dish	1	Trace metals with tetrasodium EDTA	3
experiment 13	T3	Dish	1	Trace metals with tetrasodium EDTA	4
experiment 13	T3	Dish	1	Trace metals with tetrasodium EDTA	5
experiment 14	T3	Dish	3	Inoculation 20 x 104 cells/mL algae	0	7.07	7.07	7.07						7.07	0	0	0
experiment 14	T3	Dish	3	Inoculation 20 x 104 cells/mL algae	1
experiment 14	T3	Dish	3	Inoculation 20 x 104 cells/mL algae	2
experiment 14	T3	Dish	3	Inoculation 20 x 104 cells/mL algae	3
experiment 14	T3	Dish	3	Inoculation 20 x 104 cells/mL algae	4	7.45	7.55	7.6						7.53333	0.0763763	0.0440959	0.189744
experiment 18	T3	Dish	3	Initial pH 7.0, pH adjustment with HCl	0	7.03	7.03	7.03						7.03	0	0	0
experiment 18	T3	Dish	3	Initial pH 7.0, pH adjustment with HCl	1	6.5	6.53	6.54						6.52333	0.0208167	0.0120185	0.0517156
experiment 18	T3	Dish	3	Initial pH 7.0, pH adjustment with HCl	2	6.53	6.52	6.53						6.52667	0.0057735	0.00333333	0.0143433
experiment 18	T3	Dish	3	Initial pH 7.0, pH adjustment with HCl	3	6.45	6.48	6.49						6.47333	0.0208167	0.0120185	0.0517156
experiment 18	T3	Dish	3	Initial pH 7.0, pH adjustment with HCl	4	6.45	6.45	6.52						6.47333	0.0404145	0.0233333	0.100403
experiment 2	T3	Flask	3	12/12h light/dark, ca. 16 par	0	7.11	7.11	7.11						7.11	0	0	0
experiment 2	T3	Flask	3	12/12h light/dark, ca. 16 par	1
experiment 2	T3	Flask	3	12/12h light/dark, ca. 16 par	2
experiment 2	T3	Flask	3	12/12h light/dark, ca. 16 par	3
experiment 2	T3	Flask	3	12/12h light/dark, ca. 16 par	4
experiment 2	T3	Flask	3	12/12h light/dark, ca. 16 par	5	7.25	7.16	7.18						7.19667	0.0472582	0.0272845	0.117405
experiment 6	T3	Dish	3	Inoculation 10 x 104 cells/mL algae	0	6.52	6.52	6.52						6.52	0	0	0
experiment 6	T3	Dish	3	Inoculation 10 x 104 cells/mL algae	1
experiment 6	T3	Dish	3	Inoculation 10 x 104 cells/mL algae	2
experiment 6	T3	Dish	3	Inoculation 10 x 104 cells/mL algae	3
experiment 6	T3	Dish	3	Inoculation 10 x 104 cells/mL algae	4	6.95	6.99	6.87						6.93667	0.061101	0.0352767	0.151796
experiment 6	T3	Dish	3	Inoculation 10 x 104 cells/mL algae	5
experiment 8	T3	Dish	3	Inoculation 10 x 104 cells/mL algae	0	7.08	7.08	7.08						7.08	1.08779e-15	6.28037e-16	2.70244e-15
experiment 8	T3	Dish	3	Inoculation 10 x 104 cells/mL algae	1
experiment 8	T3	Dish	3	Inoculation 10 x 104 cells/mL algae	2
experiment 8	T3	Dish	3	Inoculation 10 x 104 cells/mL algae	3
experiment 8	T3	Dish	3	Inoculation 10 x 104 cells/mL algae	4
experiment 8	T3	Dish	3	Inoculation 10 x 104 cells/mL algae	5	7.25	7.27	7.33						7.28333	0.0416333	0.024037	0.103431
experiment 9	T3	Dish	3	Inoculation 10 x 104 cells/mL algae	0	7.07	7.07	7.07						7.07	0	0	0
experiment 9	T3	Dish	3	Inoculation 10 x 104 cells/mL algae	1
experiment 9	T3	Dish	3	Inoculation 10 x 104 cells/mL algae	2
experiment 9	T3	Dish	3	Inoculation 10 x 104 cells/mL algae	3
experiment 9	T3	Dish	3	Inoculation 10 x 104 cells/mL algae	4	7.21	7.24	7.28						7.24333	0.0351188	0.0202759	0.0872471
experiment 1	T4	Flask	3	T82MV, 150 rpm, 23 ± 1°C, 24h light, 60 – 80 par	0	7.2	7.2	7.2						7.2	0	0	0
experiment 1	T4	Flask	3	T82MV, 150 rpm, 23 ± 1°C, 24h light, 60 – 80 par	1
experiment 1	T4	Flask	3	T82MV, 150 rpm, 23 ± 1°C, 24h light, 60 – 80 par	2
experiment 1	T4	Flask	3	T82MV, 150 rpm, 23 ± 1°C, 24h light, 60 – 80 par	3
experiment 1	T4	Flask	3	T82MV, 150 rpm, 23 ± 1°C, 24h light, 60 – 80 par	4	9.9	9.95	9.94						9.93	0.0264575	0.0152753	0.0657294
experiment 10	T4	Dish	3	Inoculation 20 x 104 cells/mL algae	0	7.14	7.14	7.14						7.14	0	0	0
experiment 10	T4	Dish	3	Inoculation 20 x 104 cells/mL algae	1
experiment 10	T4	Dish	3	Inoculation 20 x 104 cells/mL algae	2
experiment 10	T4	Dish	3	Inoculation 20 x 104 cells/mL algae	3
experiment 10	T4	Dish	3	Inoculation 20 x 104 cells/mL algae	4
experiment 10	T4	Dish	3	Inoculation 20 x 104 cells/mL algae	5	6.76	6.74	6.76						6.75333	0.011547	0.00666667	0.0286867
experiment 18	T4	Dish	3	Initial pH 7.5, pH adjustment with HCl	0	7.5	7.5	7.5						7.5	0	0	0
experiment 18	T4	Dish	3	Initial pH 7.5, pH adjustment with HCl	1	6.68	6.7	6.72						6.7	0.02	0.011547	0.0496868
experiment 18	T4	Dish	3	Initial pH 7.5, pH adjustment with HCl	2	6.64	6.65	6.69						6.66	0.0264575	0.0152753	0.0657294
experiment 18	T4	Dish	3	Initial pH 7.5, pH adjustment with HCl	3	6.43	6.53	6.52						6.49333	0.0550757	0.031798	0.136827
experiment 18	T4	Dish	3	Initial pH 7.5, pH adjustment with HCl	4	6.81	6.8	6.77						6.79333	0.0208167	0.0120185	0.0517156
experiment 2	T4	Flask	3	12/12h light/dark, 60 – 80 par	0	7.11	7.11	7.11						7.11	0	0	0
experiment 2	T4	Flask	3	12/12h light/dark, 60 – 80 par	1
experiment 2	T4	Flask	3	12/12h light/dark, 60 – 80 par	2
experiment 2	T4	Flask	3	12/12h light/dark, 60 – 80 par	3
experiment 2	T4	Flask	3	12/12h light/dark, 60 – 80 par	4
experiment 2	T4	Flask	3	12/12h light/dark, 60 – 80 par	5	7.28	7.4	7.42						7.36667	0.0757188	0.0437163	0.188111
experiment 6	T4	Dish	3	Inoculation 20 x 104 cells/mL algae	0	6.52	6.52	6.52						6.52	0	0	0
experiment 6	T4	Dish	3	Inoculation 20 x 104 cells/mL algae	1
experiment 6	T4	Dish	3	Inoculation 20 x 104 cells/mL algae	2
experiment 6	T4	Dish	3	Inoculation 20 x 104 cells/mL algae	3
experiment 6	T4	Dish	3	Inoculation 20 x 104 cells/mL algae	4	6.97	7.04	6.84						6.95	0.101489	0.0585947	0.252133
experiment 6	T4	Dish	3	Inoculation 20 x 104 cells/mL algae	5
experiment 8	T4	Dish	3	Inoculation 20 x 104 cells/mL algae	0	7.08	7.08	7.08						7.08	1.08779e-15	6.28037e-16	2.70244e-15
experiment 8	T4	Dish	3	Inoculation 20 x 104 cells/mL algae	1
experiment 8	T4	Dish	3	Inoculation 20 x 104 cells/mL algae	2
experiment 8	T4	Dish	3	Inoculation 20 x 104 cells/mL algae	3
experiment 8	T4	Dish	3	Inoculation 20 x 104 cells/mL algae	4
experiment 8	T4	Dish	3	Inoculation 20 x 104 cells/mL algae	5	7.45	7.42	7.61						7.49333	0.102144	0.0589727	0.253759
experiment 9	T4	Dish	3	Inoculation 20 x 104 cells/mL algae	0	7.07	7.07	7.07						7.07	0	0	0
experiment 9	T4	Dish	3	Inoculation 20 x 104 cells/mL algae	1
experiment 9	T4	Dish	3	Inoculation 20 x 104 cells/mL algae	2
experiment 9	T4	Dish	3	Inoculation 20 x 104 cells/mL algae	3
experiment 9	T4	Dish	3	Inoculation 20 x 104 cells/mL algae	4	7.4	7.51	7.62						7.51	0.11	0.0635085	0.273277
experiment 1	T5	Dish	3	OECD med., 65 rpm, 25 ± 1°C, 12/12h light/dark, 16 par	0	7.6	7.6	7.6						7.6	1.08779e-15	6.28037e-16	2.70244e-15
experiment 1	T5	Dish	3	OECD med., 65 rpm, 25 ± 1°C, 12/12h light/dark, 16 par	1
experiment 1	T5	Dish	3	OECD med., 65 rpm, 25 ± 1°C, 12/12h light/dark, 16 par	2
experiment 1	T5	Dish	3	OECD med., 65 rpm, 25 ± 1°C, 12/12h light/dark, 16 par	3
experiment 1	T5	Dish	3	OECD med., 65 rpm, 25 ± 1°C, 12/12h light/dark, 16 par	4	8.05	8	7.98						8.01	0.0360555	0.0208167	0.0895741
experiment 18	T5	Dish	3	Initial pH 8.0, pH adjustment with HCl	0	8.03	8.03	8.03						8.03	0	0	0
experiment 18	T5	Dish	3	Initial pH 8.0, pH adjustment with HCl	1	6.79	6.81	6.83						6.81	0.02	0.011547	0.0496868
experiment 18	T5	Dish	3	Initial pH 8.0, pH adjustment with HCl	2	6.73	6.72	6.75						6.73333	0.0152753	0.00881917	0.0379489
experiment 18	T5	Dish	3	Initial pH 8.0, pH adjustment with HCl	3	6.58	6.62	6.79						6.66333	0.111505	0.0643774	0.277016
experiment 18	T5	Dish	3	Initial pH 8.0, pH adjustment with HCl	4	6.84	6.84	6.81						6.83	0.0173205	0.01	0.04303
experiment 1	T6	Dish	3	OECD med., 150 rpm, 23 ± 1°C, 24h light, 60 – 80 par	0	7.6	7.6	7.6						7.6	1.08779e-15	6.28037e-16	2.70244e-15
experiment 1	T6	Dish	3	OECD med., 150 rpm, 23 ± 1°C, 24h light, 60 – 80 par	1
experiment 1	T6	Dish	3	OECD med., 150 rpm, 23 ± 1°C, 24h light, 60 – 80 par	2
experiment 1	T6	Dish	3	OECD med., 150 rpm, 23 ± 1°C, 24h light, 60 – 80 par	3
experiment 1	T6	Dish	3	OECD med., 150 rpm, 23 ± 1°C, 24h light, 60 – 80 par	4	10.11	10.09	10.09						10.0967	0.011547	0.00666667	0.0286867
experiment 18	T6	Dish	3	no HCl, pH adjustment with aeration	0	6.36	6.36	6.36						6.36	0	0	0
experiment 18	T6	Dish	3	no HCl, pH adjustment with aeration	1	6.52	6.5	6.49						6.50333	0.0152753	0.00881917	0.0379489
experiment 18	T6	Dish	3	no HCl, pH adjustment with aeration	2	6.42	6.37	6.35						6.38	0.0360555	0.0208167	0.0895741
experiment 18	T6	Dish	3	no HCl, pH adjustment with aeration	3	6.43	6.11	6.41						6.31667	0.179258	0.103494	0.445337
experiment 18	T6	Dish	3	no HCl, pH adjustment with aeration	4	6.74	6.68	6.74						6.72	0.034641	0.02	0.08606
experiment 1	T7	Flask	3	OECD med., 65 rpm, 25 ± 1°C, 12/12h light/dark, 16 par	0	7.6	7.6	7.6						7.6	1.08779e-15	6.28037e-16	2.70244e-15
experiment 1	T7	Flask	3	OECD med., 65 rpm, 25 ± 1°C, 12/12h light/dark, 16 par	1
experiment 1	T7	Flask	3	OECD med., 65 rpm, 25 ± 1°C, 12/12h light/dark, 16 par	2
experiment 1	T7	Flask	3	OECD med., 65 rpm, 25 ± 1°C, 12/12h light/dark, 16 par	3
experiment 1	T7	Flask	3	OECD med., 65 rpm, 25 ± 1°C, 12/12h light/dark, 16 par	4	8.74	8.4	8.2						8.44667	0.273008	0.157621	0.678244
experiment 1	T8	Flask	3	OECD med., 150 rpm, 23 ± 1°C, 24h light, 60 – 80 par	0	7.6	7.6	7.6						7.6	1.08779e-15	6.28037e-16	2.70244e-15
experiment 1	T8	Flask	3	OECD med., 150 rpm, 23 ± 1°C, 24h light, 60 – 80 par	1
experiment 1	T8	Flask	3	OECD med., 150 rpm, 23 ± 1°C, 24h light, 60 – 80 par	2
experiment 1	T8	Flask	3	OECD med., 150 rpm, 23 ± 1°C, 24h light, 60 – 80 par	3
experiment 1	T8	Flask	3	OECD med., 150 rpm, 23 ± 1°C, 24h light, 60 – 80 par	4	10.01	10.01	10.09						10.0367	0.046188	0.0266667	0.114747
standardized TriCosm without grazing					0	7.01	7.01	7.01	7.01	7.01	7.01	7.01	7.01	7.01	9.49503e-16	3.357e-16	7.9393e-16
standardized TriCosm without grazing					1
standardized TriCosm without grazing					2
standardized TriCosm without grazing					3
standardized TriCosm without grazing					4	7.29	7.31	7.31	7.31	7.33	7.31	7.34	7.32	7.315	0.0151186	0.00534522	0.0126415
standardized TriCosm without grazing					5
standardized TriCosm without grazing					6
standardized TriCosm without grazing					7
standardized TriCosm without grazing					8	7.3	7.33	7.32	7.32	7.32	7.33	7.34	7.39	7.33125	0.0264237	0.0093422	0.0220943

## Sheet: GR daily (excl d0)
				concentrations								daily growth rates per unit								average per day					total average
Experiment	Treatment	Details	day	cells/mL Replicate 1	cells/mL Replicate 2	cells/mL Replicate 3	cells/mL Replicate 4	cells/mL Replicate 5	cells/mL Replicate 6	cells/mL Replicate 7	cells/mL Replicate 8	Replicate 1	Replicate 2	Replicate 3	Replicate 4	Replicate 5	Replicate 6	Replicate 7	Replicate 8	Average GR	SD	95%CI	n	std. error	Average GR	95%CI	std. error
experiment 1	T1	T82MV-bench top shaker-dish	0	115309	111045	118355
experiment 1	T1	T82MV-bench top shaker-dish	1	159776	108406	96629.1
experiment 1	T1	T82MV-bench top shaker-dish	2	339268	403024	531552						0.753017	1.31312	1.70492						1.25702	0.478425	0.970463	3	0.225532
experiment 1	T1	T82MV-bench top shaker-dish	4	336628	83025.1	166071						-0.00390533	-0.789927	-0.581694						-0.458509	0.407233	0.826052	3	0.191971	0.399254	0.898257	0.208751
experiment 1	T2	T82MV-Incub shaker-dish	0	82416	88507.3	93177.4
experiment 1	T2	T82MV-Incub shaker-dish	1	68812	107594	127289						-0.180402	0.195275	0.311955
experiment 1	T2	T82MV-Incub shaker-dish	2	105969	40994.8	32873						0.431771	-0.964916	-1.35381						-0.628984	0.938994	1.90471	3	0.442646
experiment 1	T2	T82MV-Incub shaker-dish	4	756119	545359	869012						0.982525	1.294	1.63735						1.30463	0.327543	0.664406	3	0.154405	0.337821	1.28456	0.298526
experiment 1	T3	T82MV-bench top shaker-flask	0	108406	104954	105157
experiment 1	T3	T82MV-bench top shaker-flask	1	118558	130335	110842						0.0895212	0.216583	0.0526536
experiment 1	T3	T82MV-bench top shaker-flask	2	216223	225766	206273						0.600906	0.549393	0.621094						0.590465	0.0369736	0.0749992	3	0.0174295
experiment 1	T3	T82MV-bench top shaker-flask	4	208304	193279	240994						-0.0186553	-0.0776828	0.077785						-0.00618437	0.0784806	0.159194	3	0.0369961	0.29214	0.117097	0.0272128
experiment 1	T4	T82MV-Incub shaker-flask	0	119370	97238.3	119573
experiment 1	T4	T82MV-Incub shaker-flask	1	247695	162619	201400						0.729967	0.514244	0.521366
experiment 1	T4	T82MV-Incub shaker-flask	2	1.53967e+06	1.27551e+06	1.6217e+06						1.82713	2.05969	2.08594						1.99092	0.142453	0.288959	3	0.067153
experiment 1	T4	T82MV-Incub shaker-flask	4	7.67813e+06	7.39752e+06	7.13437e+06						0.803404	0.8789	0.740725						0.807676	0.0691866	0.140342	3	0.0326149	1.3993	0.214651	0.0498839
experiment 1	T5	MHSW-bench top shaker-dish	0	113127	114101	115855
experiment 1	T5	MHSW-bench top shaker-dish	1	157357	145471	146251						0.330005	0.242893	0.232984
experiment 1	T5	MHSW-bench top shaker-dish	2	1.456e+06	1.58167e+06	1.82776e+06						2.22493	2.38626	2.52553						2.37891	0.150432	0.305145	3	0.0709144
experiment 1	T5	MHSW-bench top shaker-dish	4	442025	546657	456444						-0.59604	-0.531209	-0.693691						-0.60698	0.0817919	0.165911	3	0.0385571	0.885963	0.235528	0.0547357
experiment 1	T6	MHSW-Incub shaker-dish	0	133975	94421.9	103385
experiment 1	T6	MHSW-Incub shaker-dish	1	323170	337394	341485						0.880522	1.27348	1.19485
experiment 1	T6	MHSW-Incub shaker-dish	2	296281	300763	255559						-0.0868689	-0.114928	-0.289853						-0.163883	0.109991	0.223112	3	0.0518503
experiment 1	T6	MHSW-Incub shaker-dish	4	2.58746e+06	2.68644e+06	2.77101e+06						1.08356	1.09483	1.19176						1.12338	0.059482	0.120657	3	0.0280401	0.479749	0.171884	0.0399452
experiment 1	T7	MHSW-bench top shaker-flask	0	132417	103190	126571
experiment 1	T7	MHSW-bench top shaker-flask	1	153265	148589	169437						0.146215	0.364612	0.291677
experiment 1	T7	MHSW-bench top shaker-flask	2	260040	276797	268808						0.528667	0.622101	0.461516						0.537428	0.0806504	0.163596	3	0.0380189
experiment 1	T7	MHSW-bench top shaker-flask	4	517625	548216	540422						0.344208	0.341693	0.349176						0.345026	0.0038082	0.00772476	3	0.0017952	0.441227	0.0856601	0.0199071
experiment 1	T8	MHSW-Incub shaker-flask	0	119947	113517	120141
experiment 1	T8	MHSW-Incub shaker-flask	1	383572	370517	381039						1.16248	1.18295	1.15423
experiment 1	T8	MHSW-Incub shaker-flask	2	2.12743e+06	2.41113e+06	2.33163e+06						1.71315	1.87295	1.81142						1.79917	0.0806038	0.163501	3	0.037997
experiment 1	T8	MHSW-Incub shaker-flask	4	9.64962e+06	1.00313e+07	9.00546e+06						0.756001	0.712809	0.675631						0.714814	0.0402222	0.0815889	3	0.0189609	1.25699	0.122545	0.028479
experiment 10	T1	2x10^4	0	88493.5	82144.7	96991.3
experiment 10	T1	2x10^4	1	54307.3	9279.12	8204.7						-0.488271	-2.18071	-2.46991
experiment 10	T1	2x10^4	2	13772.2	2051.18	1855.83						-1.37201	-1.50935	-1.48638						-1.45591	0.0735666	0.149226	3	0.0346796
experiment 10	T1	2x10^4	3	23539.7	1953.5	3711.65						0.536037	-0.0487902	0.693147						0.393465	0.390977	0.793078	3	0.184308
experiment 10	T1	2x10^4	5	34967.7	10158.2	2539.55						0.197868	0.824329	-0.189745						0.277484	0.511704	1.03797	3	0.241219	-0.261655	0.660091	0.153402
experiment 10	T2	5x10^4	0	213518	224555	215373
experiment 10	T2	5x10^4	1	54991	33795.5	33404.8						-1.35655	-1.89379	-1.86367
experiment 10	T2	5x10^4	2	31939.7	39558.4	28911.8						-0.543319	0.157448	-0.144451						-0.176774	0.3515	0.713002	3	0.165699
experiment 10	T2	5x10^4	3	50498	56065.4	49814.2						0.458083	0.348742	0.544051						0.450292	0.0978873	0.19856	3	0.0461445
experiment 10	T2	5x10^4	5	94354.1	116331	92888.9						0.31256	0.36496	0.311552						0.329691	0.030548	0.0619652	3	0.0144005	0.20107	0.324509	0.0754146
experiment 10	T3	10x10^4	0	449696	446082	437486
experiment 10	T3	10x10^4	1	68177.1	56846.9	70814.4						-1.88646	-2.06014	-1.82098
experiment 10	T3	10x10^4	2	75405.1	81265.6	70912.1						0.100765	0.357362	0.00137836						0.153169	0.183686	0.372599	3	0.0865905
experiment 10	T3	10x10^4	3	129517	152959	121898						0.540938	0.632447	0.541748						0.571711	0.052601	0.106699	3	0.0247963
experiment 10	T3	10x10^4	5	231392	315588	231392						0.290151	0.362134	0.320463						0.324249	0.0361406	0.0733095	3	0.0170368	0.349709	0.184202	0.0428079
experiment 10	T4	20x10^4	0	816465	823205	886694
experiment 10	T4	20x10^4	1	123950	130787	167024						-1.88511	-1.83964	-1.66936
experiment 10	T4	20x10^4	2	223187	221722	172787						0.588137	0.527857	0.033921						0.383305	0.304073	0.616797	3	0.143341
experiment 10	T4	20x10^4	3	372728	381421	299179						0.512837	0.542478	0.54898						0.534765	0.0192668	0.0390817	3	0.00908244
experiment 10	T4	20x10^4	5	660185	689683	505663						0.285836	0.296164	0.262415						0.281472	0.0172926	0.0350772	3	0.00815179	0.399847	0.230319	0.0535252
experiment 11	T1	T82MV-2x10^4	0	376052	332106	330223
experiment 11	T1	T82MV-2x10^4	1	515424	72824.8	81614						0.315262	-1.5174	-1.39777
experiment 11	T1	T82MV-2x10^4	3	87892	93542.2	87264.2						-0.88444	0.125178	0.0334697						-0.241931	0.558316	1.13252	3	0.263193
experiment 11	T1	T82MV-2x10^4	4	94170	131210	95425.6						0.0689929	0.338388	0.0894066						0.165596	0.14999	0.304248	3	0.070706	-0.0381675	0.718383	0.166949
experiment 11	T2	T82MV-10x10^4	0	1.45712e+06	1.41318e+06	1.38618e+06
experiment 11	T2	T82MV-10x10^4	1	241703	217219	243586						-1.79651	-1.87269	-1.73884
experiment 11	T2	T82MV-10x10^4	3	619639	592643	710670						0.470713	0.501844	0.535368						0.502642	0.0323347	0.0655894	3	0.0152427
experiment 11	T2	T82MV-10x10^4	4	815512	747082	713181						0.27468	0.231582	0.00352734						0.16993	0.145711	0.295568	3	0.0686889	0.336286	0.180579	0.0419658
experiment 11	T3	T82MV-20x10^4	0	2.67192e+06	2.72214e+06	2.95631e+06
experiment 11	T3	T82MV-20x10^4	1	1.69883e+06	1.82439e+06	1.66869e+06						-0.452858	-0.400175	-0.571902
experiment 11	T3	T82MV-20x10^4	3	3.88797e+06	4090117	4.27155e+06						0.413974	0.403665	0.469968						0.429202	0.0356787	0.0723725	3	0.0168191
experiment 11	T3	T82MV-20x10^4	4	4.39523e+06	4.72671e+06	4.89119e+06						0.122633	0.144655	0.135459						0.134249	0.0110605	0.0224358	3	0.00521399	0.281726	0.0474042	0.0110165
experiment 12	T1	0.05ml/L metal stock	0	107405	106957	101475
experiment 12	T1	0.05ml/L metal stock	1	5705.88	4810.84	4027.68						-2.93511	-3.10156	-3.22662
experiment 12	T1	0.05ml/L metal stock	3	1	895.04	1						-4.32463	-0.840879	-4.15047						-3.10533	1.963	3.98186	3	0.925367
experiment 12	T1	0.05ml/L metal stock	5	10069.2	14768.2	6824.68						4.60862	1.40168	4.41415						3.47482	1.79802	3.6472	3	0.847595	0.184745	3.81453	0.886481
experiment 12	T2	0.1ml/L metal stock	0	108412	106174	114565
experiment 12	T2	0.1ml/L metal stock	1	4698.96	13313.7	4251.44						-3.13859	-2.07629	-3.29389
experiment 12	T2	0.1ml/L metal stock	3	9733.56	1230.68	2573.24						0.364119	-1.19061	-0.251046						-0.35918	0.782987	1.58825	3	0.369104
experiment 12	T2	0.1ml/L metal stock	5	19690.9	11971.2	12083						0.352288	1.13747	0.773319						0.754358	0.392933	0.797046	3	0.18523	0.197589	1.19265	0.277167
experiment 13	T1	EDTA dinitrolo DN	0	67874.8	83983.3
experiment 13	T1	EDTA dinitrolo DN	1	41004.9	37344.6							-0.503974	-0.810428
experiment 13	T1	EDTA dinitrolo DN	2	40245.9	32942.2							-0.0186844	-0.125434							-0.0720593	0.0754835	0.162403	2	0.0377418
experiment 13	T1	EDTA dinitrolo DN	4	83325.4	79311							0.363874	0.439311							0.401592	0.0533421	0.114766	2	0.0266711
experiment 13	T1	EDTA dinitrolo DN	5	169097	177649							0.707717	0.80643							0.757073	0.0698011	0.150177	2	0.0349005	0.362202	0.142448	0.0331045
experiment 13	T2	EDTA disodium Na2	0	71720.6	70438.7
experiment 13	T2	EDTA disodium Na2	1	33886.8	22366.3							-0.749752	-1.14719
experiment 13	T2	EDTA disodium Na2	2	23884.4	18419.3							-0.349801	-0.194156							-0.271979	0.110058	0.236789	2	0.0550288
experiment 13	T2	EDTA disodium Na2	4	63253.1	124550							0.48696	0.955652							0.721306	0.331416	0.713041	2	0.165708
experiment 13	T2	EDTA disodium Na2	5	125579	185526							0.685787	0.398489							0.542138	0.20315	0.437078	2	0.101575	0.330488	0.462303	0.107437
experiment 13	T3	EDTA tetrasodium Na4	0	74351.9	68566.4
experiment 13	T3	EDTA tetrasodium Na4	1	41578.4	39790.4							-0.581229	-0.544176
experiment 13	T3	EDTA tetrasodium Na4	2	38879.6	35101.3							-0.0671111	-0.125389							-0.0962502	0.0412089	0.0886609	2	0.0206044
experiment 13	T3	EDTA tetrasodium Na4	4	80997.7	103145							0.366976	0.538948							0.452962	0.121603	0.261628	2	0.0608014
experiment 13	T3	EDTA tetrasodium Na4	5	129795	153342							0.471538	0.39654							0.434039	0.0530317	0.114098	2	0.0265158	0.263584	0.154796	0.0359739
experiment 14	T1	T86VK-2x10^4	0	261212	275987	258045
experiment 14	T1	T86VK-2x10^4	1	24484.2	21345.2	552464						-2.3673	-2.55953	0.761253
experiment 14	T1	T86VK-2x10^4	3	57757.6	2.26259e+06	55246.4						0.429113	2.33172	-1.15129						0.536513	1.74399	3.5376	3	0.822124
experiment 14	T1	T86VK-2x10^4	4	55874.2	56502	62780						-0.0331522	-3.68999	0.127833						-1.19844	2.15925	4.37994	3	1.01788	-0.330961	3.95877	0.920002
experiment 14	T2	T86VK-10x10^5	0	1428245	1.28762e+06	1.41757e+06
experiment 14	T2	T86VK-10x10^5	1	305739	482150	232914						-1.54147	-0.982293	-1.80603
experiment 14	T2	T86VK-10x10^5	3	594527	661073	529235						0.332517	0.157804	0.410382						0.300235	0.129347	0.262374	3	0.0609746
experiment 14	T2	T86VK-10x10^5	4	762149	907799	638473						0.248377	0.317158	0.187645						0.25106	0.0647979	0.13144	3	0.030546	0.275647	0.196907	0.0457603
experiment 14	T3	T86VK-20x10^9	0	2.66376e+06	2.68636e+06	2.49613e+06
experiment 14	T3	T86VK-20x10^9	1	1246183	1.29452e+06	1.45775e+06						-0.759652	-0.730043	-0.537847
experiment 14	T3	T86VK-20x10^9	3	3.38259e+06	3.09757e+06	3945723						0.499278	0.436237	0.497868						0.477794	0.0359968	0.0730177	3	0.016969
experiment 14	T3	T86VK-20x10^9	4	4.20563e+06	3.79442e+06	4.91191e+06						0.217784	0.202916	0.21903						0.213243	0.00896542	0.0181859	3	0.00422634	0.345519	0.0456018	0.0105977
experiment 15	Not shown	flask- not mixed	0	96938.6	96938.6	96938.6
experiment 15	Not shown	flask- not mixed	1	70313.8	72492.2	77272.5						-0.32111	-0.290599	-0.226739
experiment 15	Not shown	flask- not mixed	2	45080.7	51192.3	43446.9						-0.444514	-0.347889	-0.575799						-0.456067	0.114393	0.232042	3	0.0539256
experiment 15	Not shown	flask- not mixed	4	1	1	1						-5.3581	-5.42167	-5.33965						-5.37314	0.0430302	0.0872848	3	0.0202846
experiment 15	Not shown	flask- not mixed	6	75638.8	80540.1	62931.4						5.61686	5.64826	5.5249						5.59667	0.0641078	0.13004	3	0.0302207	-0.0775121	0.149789	0.0348103
experiment 15	Not shown	flask - mixed	0	96938.6	96938.6	96938.6
experiment 15	Not shown	flask - mixed	2	155755	93792.1	155029						0.237104	-0.016499	0.234768
experiment 15	Not shown	flask - mixed	4	317017	358467	278109						0.355335	0.670378	0.292199						0.439304	0.202591	0.410946	3	0.0955022
experiment 15	Not shown	flask - mixed	6	747069	516461	649888						0.428601	0.182582	0.424394						0.345192	0.140841	0.285689	3	0.0663929	0.392248	0.348317	0.0809476
experiment 15	T1	dish- not mixed	0	85320.5	85320.5	85320.5
experiment 15	T1	dish- not mixed	1	42236.7	47622.2	45988.4						-0.703126	-0.583117	-0.618027
experiment 15	T1	dish- not mixed	2	19061	26866.9	18153.3						-0.795646	-0.572404	-0.929536						-0.765862	0.18042	0.365973	3	0.0850506
experiment 15	T1	dish- not mixed	4	12888.8	18818.9	10226.4						-0.19564	-0.178016	-0.286942						-0.220199	0.0584686	0.118601	3	0.0275624
experiment 15	T1	dish- not mixed	6	30316	58695.7	42236.7						0.427657	0.568752	0.70916						0.568523	0.140752	0.285508	3	0.066351	-0.139179	0.256694	0.0596547
experiment 15	T1 mixed	dish -mixed	0	85320.5	85320.5	85320.5
experiment 15	T1 mixed	dish -mixed	2	66683.1	98390.9	74368						-0.123231	0.0712667	-0.0686944
experiment 15	T1 mixed	dish -mixed	4	199565	232786	195935						0.548095	0.430585	0.484378						0.487686	0.0588245	0.119323	3	0.0277302
experiment 15	T1 mixed	dish -mixed	6	474043	552163	495464						0.432579	0.431862	0.463857						0.442766	0.0182689	0.0370576	3	0.00861204	0.465226	0.0781902	0.0181711
experiment 16	T1	pH 7-HCl adjusted	0	89798.3	81931.9	87317.4
experiment 16	T1	pH 7-HCl adjusted	1	195027	197508	191638						0.775571	0.87989	0.78606
experiment 16	T1	pH 7-HCl adjusted	2	413593	440036	394955						0.751744	0.801078	0.723163						0.758661	0.0394156	0.0799527	3	0.0185807
experiment 16	T1	pH 7-HCl adjusted	4	761289	745556	797111						0.305066	0.263637	0.351111						0.306604	0.0437573	0.0887597	3	0.0206274	0.532633	0.0843562	0.019604
experiment 16	T2	pH 8.4 - no HCl	0	90706	92521.3	88709.1
experiment 16	T2	pH 8.4 - no HCl	1	195874	189884	200775						0.769849	0.718972	0.816825
experiment 16	T2	pH 8.4 - no HCl	2	352840	363005	336683						0.588542	0.648007	0.516955						0.584501	0.0656194	0.133106	3	0.0309333
experiment 16	T2	pH 8.4 - no HCl	4	686134	677179	611464						0.33253	0.311759	0.298357						0.314215	0.0172185	0.034927	3	0.0081169	0.449358	0.0840164	0.0195251
experiment 17	T1	only algae Na2SiO3 x 2	0	158093	164726	195900
experiment 17	T1	only algae Na2SiO3 x 2	1	140516	138194	143832						-0.117862	-0.17562	-0.308955
experiment 17	T1	only algae Na2SiO3 x 2	3	553971	710837	640529						0.685896	0.818891	0.746824						0.750537	0.0665751	0.135044	3	0.0313838
experiment 17	T1	only algae Na2SiO3 x 2	4	753984	865083	989448						0.308257	0.196382	0.434852						0.313164	0.119311	0.242016	3	0.0562436
experiment 17	T1	only algae Na2SiO3 x 2	5	1.41209e+06	1.60842e+06	1.82531e+06						0.627456	0.620183	0.61236						0.619999	0.00754955	0.0153139	3	0.00355889	0.561233	0.130792	0.0303954
experiment 18	T1	initial pH value 6.0	0	144984	135363	139780
experiment 18	T1	initial pH value 6.0	1	60874.1	53310.2	59179.8						-0.867819	-0.931833	-0.859493
experiment 18	T1	initial pH value 6.0	2	23478.3	22389.1	18455.9						-0.952732	-0.867555	-1.1652						-0.995162	0.153291	0.310943	3	0.072262
experiment 18	T1	initial pH value 6.0	3	7019.28	12223.2	6837.74						-1.20742	-0.605235	-0.992924						-0.935191	0.305213	0.61911	3	0.143879
experiment 18	T1	initial pH value 6.0	4	1	1210.22	1						-8.85642	-2.31254	-8.83021						-6.66639	3.77057	7.64843	3	1.77746	-2.86558	2.85949	0.664535
experiment 18	T2	initial pH value 6.5	0	126710	131611	125560
experiment 18	T2	initial pH value 6.5	1	46230.4	57182.9	59603.3						-1.00826	-0.833599	-0.745075
experiment 18	T2	initial pH value 6.5	2	17003.6	24325.4	20755.3						-1.00021	-0.854733	-1.05491						-0.969952	0.103463	0.20987	3	0.048773
experiment 18	T2	initial pH value 6.5	3	5990.59	5930.08	6958.77						-1.04323	-1.41148	-1.0928						-1.18251	0.199844	0.405374	3	0.0942073
experiment 18	T2	initial pH value 6.5	4	1	1	1						-8.69795	-8.68779	-8.84776						-8.7445	0.0895689	0.181686	3	0.0422232	-3.63232	0.265644	0.0617345
experiment 18	T3	initial pH value 7.0	0	125016	127194	126589
experiment 18	T3	initial pH value 7.0	1	70918.9	68861.5	85199.5						-0.566903	-0.613617	-0.39595
experiment 18	T3	initial pH value 7.0	2	35398.9	36064.6	40965.9						-0.694855	-0.646787	-0.732254						-0.691299	0.0428445	0.0869081	3	0.0201971
experiment 18	T3	initial pH value 7.0	3	16519.5	20634.3	25475.1						-0.76214	-0.558358	-0.475038						-0.598512	0.147703	0.299608	3	0.0696277
experiment 18	T3	initial pH value 7.0	4	12888.8	13312.4	14885.7						-0.24818	-0.438255	-0.537301						-0.407912	0.14693	0.29804	3	0.0692634	-0.565908	0.228185	0.0530294
experiment 18	T4	initial pH value 7.5	0	84412.8	117210	103111
experiment 18	T4	initial pH value 7.5	1	43870.5	53975.8	76970						-0.654478	-0.77543	-0.292388
experiment 18	T4	initial pH value 7.5	2	13675.5	25535.6	33039						-1.16564	-0.748461	-0.845727						-0.919941	0.218265	0.442741	3	0.102891
experiment 18	T4	initial pH value 7.5	3	968.176	13251.9	17669.2						-2.64795	-0.655934	-0.625865						-1.30992	1.15887	2.35071	3	0.546295
experiment 18	T4	initial pH value 7.5	4	10710.4	7745.41	5203.95						2.40356	-0.537041	-1.22241						0.214704	1.92633	3.90747	3	0.908081	-0.671717	2.23364	0.519089
experiment 18	T5	initial pH value 8.0	0	121869	126831	105592																	0
experiment 18	T5	initial pH value 8.0	1	73218.3	52402.5	44717.6						-0.509502	-0.883901	-0.859212
experiment 18	T5	initial pH value 8.0	2	31828.8	19968.6	16459						-0.833074	-0.964792	-0.999496						-0.932454	0.0877971	0.178092	3	0.041388
experiment 18	T5	initial pH value 8.0	3	11436.6	4901.39	6837.74						-1.02355	-1.40464	-0.878414						-1.1022	0.271788	0.551309	3	0.128122
experiment 18	T5	initial pH value 8.0	4	2057.37	1	1						-1.71539	-8.49727	-8.83021						-6.34762	4.01509	8.14442	3	1.89273	-2.79409	2.95794	0.687414
experiment 18	T6	initial pH value ~7 - no HCl	0	126347	111401	109041																	0
experiment 18	T6	initial pH value ~7 - no HCl	1	54883.5	55125.5	48106.2						-0.833819	-0.703521	-0.81831
experiment 18	T6	initial pH value ~7 - no HCl	2	24749	18274.3	22389.1						-0.796427	-1.10412	-0.764839						-0.888461	0.187429	0.380192	3	0.0883551
experiment 18	T6	initial pH value ~7 - no HCl	3	50829.2	52947.1	54217.9						0.719687	1.0638	0.884437						0.889307	0.172107	0.349111	3	0.0811319
experiment 18	T6	initial pH value ~7 - no HCl	4	182017	181715	173001						1.27563	1.23314	1.16029						1.22302	0.0583336	0.118327	3	0.0274987	0.407955	0.282543	0.0656619
experiment 19	T1	only algae Na2SiO3 x1, no HCl	0	149765	149765	149765																	0
experiment 19	T1	only algae Na2SiO3 x1, no HCl	3	377286	365971	407421						0.307979	0.297829	0.333593						0.313134	0.018431	0.0373863	3	0.00868844
experiment 19	T1	only algae Na2SiO3 x1, no HCl	4	665682	590345	605897						0.567808	0.478155	0.396863						0.480942	0.0855062	0.173445	3	0.040308
experiment 19	T1	only algae Na2SiO3 x1, no HCl	5	926605	917286	870572						0.330716	0.440712	0.362441						0.377956	0.0566156	0.114842	3	0.0266888	0.390677	0.108558	0.0252284
experiment 2	T1	T82MV-bench top shaker-dish	0	73075.9	71248.5	68812
experiment 2	T1	T82MV-bench top shaker-dish	1	20893.3	1	14395.9						-1.25207	-11.1739	-1.56443
experiment 2	T1	T82MV-bench top shaker-dish	3	18659.8	1	182.74						-0.0565283	0	-2.18332						-0.746615	1.24454	2.52449	3	0.586682
experiment 2	T1	T82MV-bench top shaker-dish	5	147390	66984.5	103127						1.03336	5.55611	3.16782						3.25243	2.26256	4.5895	3	1.06658	1.25291	3.557	0.826632
experiment 2	T2	T82MV-Incub shaker-dish	0	90740.8	69421.1	88710.4
experiment 2	T2	T82MV-Incub shaker-dish	1	22923.8	10944.1	10335						-1.37583	-1.84739	-2.14984
experiment 2	T2	T82MV-Incub shaker-dish	3	38761.3	71045.4	65563.2						0.262624	0.935258	0.92374						0.707207	0.385064	0.781084	3	0.181521
experiment 2	T2	T82MV-Incub shaker-dish	5	874291	489521	383329						1.558	0.965054	0.882939						1.13533	0.368335	0.747151	3	0.173635	0.921268	0.764118	0.177578
experiment 2	T3	T82MV-bench top shaker-flask	0	117340	107797	108203
experiment 2	T3	T82MV-bench top shaker-flask	1	105157	211756	85258.6						-0.109619	0.675187	-0.238317
experiment 2	T3	T82MV-bench top shaker-flask	3	134192	142314	70842.4						0.12191	-0.198698	-0.0926156						-0.0564677	0.163332	0.331311	3	0.0769955
experiment 2	T3	T82MV-bench top shaker-flask	5	181705	220893	235715						0.151555	0.21982	0.601083						0.324152	0.242245	0.491384	3	0.114196	0.133842	0.411348	0.0955955
experiment 2	T4	T82MV-Incub shaker-flask	0	77949	70436.3	92365.2
experiment 2	T4	T82MV-Incub shaker-flask	1	70842.4	73888.1	82416						-0.0955968	0.0478426	-0.113971
experiment 2	T4	T82MV-Incub shaker-flask	3	377237	115106	452567						0.836208	0.221652	0.851578						0.63648	0.359333	0.728891	3	0.169391
experiment 2	T4	T82MV-Incub shaker-flask	5	420283	365461	581298						0.0540267	0.577652	0.125163						0.252281	0.284016	0.576113	3	0.133886	0.44438	0.652502	0.151639
experiment 20	T1	Na2SiO3- only algae	0	158524	157529	155539
experiment 20	T1	Na2SiO3- only algae	6	3.15191e+06	3.22653e+06	3.17711e+06						0.49831	0.503259	0.502805						0.501458	0.00273581	0.00554947	3	0.00128967
experiment 20	T1	Na2SiO3- only algae	8	5.4323e+06	5.46911e+06	5.82297e+06						0.272177	0.263855	0.302919						0.27965	0.0205763	0.0417381	3	0.00969977	0.390554	0.0236438	0.00549472
experiment 20	T2	NaHCO3 - only algae	0	154876	144263	154213																	0
experiment 20	T2	NaHCO3 - only algae	6	1.3972e+06	1.9192e+06	1.88106e+06						0.3666	0.431337	0.416877						0.404938	0.0339797	0.0689262	3	0.0160182
experiment 20	T2	NaHCO3 - only algae	8	3.48985e+06	4.3289e+06	4.3153e+06						0.457694	0.406702	0.415165						0.42652	0.0273269	0.0554313	3	0.012882	0.415729	0.0621788	0.0144501
experiment 3	T1	dish	0	65360.2	67390.6	73888.1																	0
experiment 3	T1	dish	1	5868	385.785	9522.81						-2.4104	-5.16298	-2.04886
experiment 3	T1	dish	2	32873	29624.3	32466.9						1.72314	4.34107	1.22653						2.43025	1.67335	3.3943	3	0.788823
experiment 3	T1	dish	4	488100	420892	334598						1.34893	1.32689	1.16635						1.28073	0.0996607	0.202157	3	0.0469805	1.85549	1.79823	0.417902
experiment 3	T2	flask	0	77542.9	73685	83837.3																	0
experiment 3	T2	flask	1	130741	42619.1	99268.7						0.522385	-0.547496	0.168953
experiment 3	T2	flask	2	39573.5	28812.1	74700.3						-1.19506	-0.391509	-0.284347						-0.623637	0.497756	1.00967	3	0.234644
experiment 3	T2	flask	4	652363	579267	534597						1.40122	1.50048	0.984015						1.29524	0.27406	0.555919	3	0.129193	0.335801	0.782797	0.181919
experiment 4	T1 mixed	dish -mixed	0	111930	110902	79215.7	97719.5	116526	91551.6														0
experiment 4	T1 mixed	dish -mixed	1	150570	206082	147184	127289	120577	142044			0.296557	0.619626	0.619509	0.264362	0.0341783	0.439235
experiment 4	T1 mixed	dish -mixed	3	387552	536429	489988	288140	502324	390032			0.47271	0.478331	0.601349	0.408491	0.713478	0.505045			0.517463	0.0727015	0.175806	6	0.0408567
experiment 4	T1 mixed	dish -mixed	4	511818	532801	457576	359252	588192	490714			0.278119	-0.00678659	-0.0684377	0.22058	0.157807	0.229634			0.0676315	0.184875	0.225392	6	0.0523802
experiment 4	T1 mixed	dish -mixed	5	652411	614073	537639	440403	614254	617882			0.242705	0.141965	0.161243	0.203665	0.043356	0.230437			0.181971	0.0534732	0.11778	6	0.0273716	0.255689	0.172993	0.0402029
experiment 4	T1	dish- not mixed	0	111930	110902	79215.7	97719.5	116526	91551.6														0
experiment 4	T1	dish- not mixed	1	28481.4	14210.4	8647.21	1	2721.15	7861.1			-1.36862	-2.05467	-2.21494	-11.4899	-3.75706	-2.45498
experiment 4	T1	dish- not mixed	3	98989.4	117856	110962	118037	136662	121303			0.622881	1.05774	1.27598	5.83938	1.95823	1.36818			0.985534	0.332482	3.08029	6	0.715848
experiment 4	T1	dish- not mixed	4	242666	299568	299447	231056	312328	357620			0.896674	0.932879	0.992747	0.671658	0.82654	1.08118			0.940767	0.0485199	0.226852	6	0.0527195
experiment 4	T1	dish- not mixed	5	398437	409321	310030	265403	409200	424923			0.495863	0.312158	0.0347292	0.138589	0.270153	0.172437			0.280917	0.232149	0.257106	6	0.0597503	0.735739	1.18808	0.276106
experiment 4	T2	flask- not mixed	0	109027	148454	117493																	0
experiment 4	T2	flask- not mixed	1	48073.6	107032	87560.6						-0.818865	-0.327147	-0.29405
experiment 4	T2	flask- not mixed	3	1.39401e+06	672729	442278						1.6836	0.919108	0.809804						1.13751	0.476083	0.965713	3	0.224428
experiment 4	T2	flask- not mixed	4	1161024	974172	681678						-0.182886	0.370245	0.43262						0.20666	0.338795	0.68723	3	0.159709
experiment 4	T2	flask- not mixed	5	1.16762e+06	742693	720440						0.00566103	-0.271305	0.0553037						-0.0701136	0.175996	0.357	3	0.0829655	0.424684	0.669981	0.155701
experiment 4	T2 mixed	flask - mixed	0	109027	148454	117493																	0
experiment 4	T2 mixed	flask - mixed	1	333673	271027	260686						1.11856	0.601943	0.796937
experiment 4	T2 mixed	flask - mixed	3	1.00574e+06	760410	945630						0.551657	0.515821	0.644267						0.570581	0.0662814	0.134449	3	0.0312454
experiment 4	T2 mixed	flask - mixed	4	1.43036e+06	1.09058e+06	1.1372e+06						0.352204	0.360604	0.184472						0.299093	0.0993535	0.201534	3	0.0468357
experiment 4	T2 mixed	flask - mixed	5	1.68856e+06	1.32272e+06	1.33506e+06						0.165954	0.192984	0.160406						0.173115	0.0174298	0.0353555	3	0.00821649	0.347596	0.123779	0.0287658
experiment 5	T1	dish- not mixed	0	117543	98050.4	96223																	0
experiment 5	T1	dish- not mixed	1	38761.3	19269	12162.4						-1.10938	-1.62699	-2.06832
experiment 5	T1	dish- not mixed	2	1	1	1						-10.5652	-9.86625	-9.4061						-9.94584	0.583621	1.18385	3	0.275122
experiment 5	T1	dish- not mixed	3	4852.78	1	16832.4						8.48731	0	9.73106						6.07279	5.29583	10.7423	3	2.49648
experiment 5	T1	dish- not mixed	4	3431.46	1	1						-0.346565	0	-9.73106						-3.35921	5.52091	11.1989	3	2.60258	-2.41075	7.70837	1.79139
experiment 5	T1 mixed	dish -mixed	0	117543	98050.4	96223																	0
experiment 5	T1 mixed	dish -mixed	1	204446	201197	184548						0.553502	0.718804	0.651239
experiment 5	T1 mixed	dish -mixed	2	169319	162213	250943						-0.188518	-0.215378	0.30732						-0.0321921	0.294332	0.59704	3	0.13875
experiment 5	T1 mixed	dish -mixed	3	139269	142314	111045						-0.195382	-0.130871	-0.815289						-0.380514	0.377905	0.766564	3	0.178146
experiment 5	T1 mixed	dish -mixed	4	216832	229218	140284						0.442718	0.476634	0.233729						0.38436	0.131548	0.266839	3	0.0620123	-0.00944854	0.543481	0.126303
experiment 5	T2	flask- not mixed	0	97847.4	107391	79979.4																	0
experiment 5	T2	flask- not mixed	1	43025.2	17035.5	43431.3						-0.821622	-1.84117	-0.610588
experiment 5	T2	flask- not mixed	2	3837.55	65766.3	24751.2						-2.41695	1.35081	-0.562308						-0.542817	1.88396	3.82152	3	0.888106
experiment 5	T2	flask- not mixed	3	288913	630231	479369						4.32129	2.25998	2.9636						3.18162	1.04781	2.12543	3	0.493941
experiment 5	T2	flask- not mixed	4	847896	1.21967e+06	1.36241e+06						1.07663	0.660249	1.04454						0.927141	0.231691	0.469975	3	0.10922	1.18865	2.13897	0.497089
experiment 5	T2 mixed	flask - mixed	0	97847.4	107391	79979.4																	0
experiment 5	T2 mixed	flask - mixed	1	221705	364852	382516						0.817938	1.22302	1.565
experiment 5	T2 mixed	flask - mixed	2	436120	629825	537643						0.676571	0.545952	0.340423						0.520982	0.16946	0.343741	3	0.0798841
experiment 5	T2 mixed	flask - mixed	3	804038	1.14982e+06	956119						0.611728	0.601921	0.575687						0.596446	0.0186338	0.0377979	3	0.00878408
experiment 5	T2 mixed	flask - mixed	4	1.39713e+06	1.91185e+06	1.67246e+06						0.552531	0.508464	0.55917						0.540055	0.0275593	0.0559028	3	0.0129916	0.552494	0.145814	0.0338866
experiment 6	T1	2x10^4	0	117211	112296	130118																	0
experiment 6	T1	2x10^4	1	4915.51	4059.26	28700.3						-3.17158	-3.32013	-1.51154
experiment 6	T1	2x10^4	3	3203.01	7103.71	475.695						-0.214152	0.279808	-2.04994						-0.661429	1.22759	2.49011	3	0.578691
experiment 6	T1	2x10^4	4	15697.9	25307	14936.8						1.58944	1.27046	3.44681						2.10224	1.1753	2.38405	3	0.554044
experiment 6	T1	2x10^4	5	24228.7	73701	37928.7						0.43401	1.06894	0.93188						0.811609	0.334113	0.677734	3	0.157503	0.750805	1.85063	0.430079
experiment 6	T2	5x10^4	0	302796	289127	267341																	0
experiment 6	T2	5x10^4	1	21660	22484.5	57971.4						-2.63759	-2.55404	-1.52857
experiment 6	T2	5x10^4	3	82485.5	96756.4	52770.4						0.668578	0.729685	-0.0469991						0.450421	0.431861	0.87601	3	0.203581
experiment 6	T2	5x10^4	4	154696	147497	119685						0.628839	0.421613	0.818911						0.623121	0.198711	0.403076	3	0.0936732
experiment 6	T2	5x10^4	5	258683	215617	265993						0.514141	0.379693	0.798607						0.564147	0.213887	0.43386	3	0.100827	0.545896	0.570982	0.132694
experiment 6	T3	10x10^4	0	647421	653066	658774																	0
experiment 6	T3	10x10^4	1	384679	337141	331306						-0.520588	-0.661177	-0.687339
experiment 6	T3	10x10^4	3	609651	628647	513402						0.230239	0.311534	0.219009						0.253594	0.0504911	0.102419	3	0.0238017
experiment 6	T3	10x10^4	4	841124	871188	801166						0.321853	0.326288	0.445009						0.364383	0.0698591	0.141706	3	0.0329319
experiment 6	T3	10x10^4	5	1.16789e+06	1.22739e+06	1.08934e+06						0.328219	0.342786	0.307261						0.326089	0.0178581	0.0362243	3	0.00841838	0.314689	0.0934496	0.0217173
experiment 6	T4	20x10^4	0	1.17319e+06	1.24845e+06	1.24042e+06																	0
experiment 6	T4	20x10^4	1	1.2004e+06	1.26081e+06	1.22374e+06						0.0229281	0.00985802	-0.0135391
experiment 6	T4	20x10^4	3	1.94547e+06	2.10492e+06	2.06997e+06						0.241423	0.25626	0.262811						0.253498	0.0109581	0.0222281	3	0.00516571
experiment 6	T4	20x10^4	4	2.31067e+06	2.60668e+06	2.46321e+06						0.172037	0.213801	0.173932						0.18659	0.0235846	0.0478402	3	0.0111179
experiment 6	T4	20x10^4	5	2.87034e+06	2.92736e+06	2.86394e+06						0.216893	0.116024	0.150731						0.161216	0.0512453	0.103949	3	0.0241573	0.200435	0.0580057	0.0134803
experiment 7	T1	dish- not mixed	0	74858.2	77977.2	85271.1																	0
experiment 7	T1	dish- not mixed	1	18090.7	7005.96	12044.5						-1.4202	-2.40966	-1.95723
experiment 7	T1	dish- not mixed	2	1727.5	1	1						-2.34873	-8.85452	-9.39636						-6.86653	3.92191	7.9554	3	1.8488
experiment 7	T1	dish- not mixed	3	8109.63	3982.84	7485.82						1.54638	8.28975	8.92077						6.2523	4.08764	8.29159	3	1.92693
experiment 7	T1	dish- not mixed	4	45250.8	23993	18138.7						1.71917	1.79577	0.885038						1.46666	0.505151	1.02468	3	0.238131	0.28414	5.75722	1.33796
experiment 7	T1 mixed	dish -mixed	0	74858.2	77977.2	85271.1
experiment 7	T1 mixed	dish -mixed	1	158642	174189	185274						0.751053	0.803725	0.776
experiment 7	T1 mixed	dish -mixed	2	210563	229757	248280						0.283135	0.27688	0.29272						0.284245	0.00797802	0.016183	3	0.00376088
experiment 7	T1 mixed	dish -mixed	3	299001	281726	266514						0.350663	0.203912	0.0708723						0.208483	0.139951	0.283885	3	0.0659738
experiment 7	T1 mixed	dish -mixed	4	278127	329952	329280						-0.0723688	0.158012	0.211481						0.0990413	0.150834	0.305959	3	0.0711037	0.197256	0.202009	0.0469461
experiment 7	T2	flask- not mixed	0	79992.7	77641.3	84791.3																	0
experiment 7	T2	flask- not mixed	1	99906.9	43043.4	74954.1						0.222303	-0.58989	-0.123316
experiment 7	T2	flask- not mixed	2	2927.15	12284.4	61614						-3.53021	-1.25388	-0.195987						-1.66003	1.70381	3.45611	3	0.803185
experiment 7	T2	flask- not mixed	3	14155.9	19002.5	4174.78						1.5761	0.436237	-2.69183						-0.226496	2.2098	4.48248	3	1.04171
experiment 7	T2	flask- not mixed	4	79992.7	77641.3	84791.3						1.73181	1.40753	3.01113						2.05016	0.847875	1.71988	3	0.399692	0.0545448	3.21949	0.748196
experiment 7	T2 mixed	flask - mixed	0	79992.7	77641.3	84791.3
experiment 7	T2 mixed	flask - mixed	1	125052	138680	131482						0.446791	0.580066	0.438675
experiment 7	T2 mixed	flask - mixed	2	245640	248711	167951						0.675143	0.584128	0.244805						0.501358	0.226794	0.460042	3	0.106912
experiment 7	T2 mixed	flask - mixed	3	297225	278319	280382						0.190622	0.112474	0.512481						0.271859	0.212017	0.430066	3	0.0999457
experiment 7	T2 mixed	flask - mixed	4	451932	748822	660095						0.419042	0.989733	0.856231						0.755002	0.298509	0.605512	3	0.140719	0.509406	0.49854	0.115859
experiment 8	T1	2x10^4	0	116564	110701	107646																	0
experiment 8	T1	2x10^4	1	29399.2	27169.5	33115.4						-1.37748	-1.40474	-1.17885
experiment 8	T1	2x10^4	2	4005.23	1981.97	1486.48						-1.99337	-2.618	-3.10359						-2.57165	0.556561	1.12896	3	0.262365
experiment 8	T1	2x10^4	3	6771.72	6771.72	7102.05						0.525155	1.22867	1.56398						1.10593	0.530174	1.07543	3	0.249926
experiment 8	T1	2x10^4	5	141793	154428	75603.8						1.52081	1.56349	1.18256						1.42229	0.208701	0.42334	3	0.0983825	-0.0144787	0.87591	0.203558
experiment 8	T2	5x10^4	0	273057	293496	273594																	0
experiment 8	T2	5x10^4	1	42901.3	43231.7	63505.6						-1.85078	-1.91529	-1.46052
experiment 8	T2	5x10^4	2	17879	19943.6	47154.3						-0.875276	-0.773668	-0.297702						-0.648882	0.308345	0.625464	3	0.145355
experiment 8	T2	5x10^4	3	35675.4	40795.5	76594.8						0.690835	0.715666	0.485104						0.630535	0.126558	0.256716	3	0.0596599
experiment 8	T2	5x10^4	5	315587	291308	499539						1.08999	0.982905	0.937578						1.00349	0.0782618	0.15875	3	0.0368929	0.328381	0.346977	0.080636
experiment 8	T3	10x10^4	0	571509	563292	564985
experiment 8	T3	10x10^4	1	172225	124203	206909						-1.19948	-1.51188	-1.00452
experiment 8	T3	10x10^4	2	196628	200757	363361						0.132512	0.480174	0.563116						0.391934	0.228462	0.463424	3	0.107698
experiment 8	T3	10x10^4	3	214961	304851	411671						0.0891441	0.41773	0.124829						0.210568	0.180293	0.365716	3	0.0849909
experiment 8	T3	10x10^4	5	975335	1.07278e+06	1.59771e+06						0.756162	0.629093	0.678052						0.687769	0.0640896	0.130003	3	0.0302121	0.43009	0.319714	0.0743003
experiment 8	T4	20x10^4	0	1.08946e+06	1.11106e+06	995072
experiment 8	T4	20x10^4	1	1.02303e+06	528855	1.04177e+06						-0.0629202	-0.742354	0.0458634
experiment 8	T4	20x10^4	2	1.22618e+06	882182	1.32598e+06						0.181137	0.511684	0.241227						0.311349	0.176077	0.357165	3	0.0830036
experiment 8	T4	20x10^4	3	1.55845e+06	1.19533e+06	1.59664e+06						0.239788	0.303782	0.185751						0.243107	0.059085	0.119851	3	0.027853
experiment 8	T4	20x10^4	5	2.90523e+06	2.49736e+06	2.75485e+06						0.311412	0.368405	0.272731						0.317516	0.0481281	0.0976256	3	0.0226878	0.290658	0.191547	0.0445148
experiment 9	T1	2x10^4	0	119361	128785	128528
experiment 9	T1	2x10^4	1	23505.5	29446	27245.8						-1.62492	-1.47559	-1.55125
experiment 9	T1	2x10^4	3	12541.1	9644.21	8580.78						-0.314109	-0.5581	-0.577687						-0.483299	0.14685	0.297877	3	0.0692255
experiment 9	T1	2x10^4	4	5133.8	7554.02	6123.89						-0.893168	-0.244278	-0.337327						-0.491591	0.350874	0.711732	3	0.165404	-0.487445	0.504805	0.117315
experiment 9	T2	5x10^4	0	312172	289950	286209
experiment 9	T2	5x10^4	1	69563	77667.1	75613.5						-1.50132	-1.31728	-1.33109
experiment 9	T2	5x10^4	3	93581.8	64135.8	68572.9						0.148302	-0.095714	-0.048869						0.00123961	0.129496	0.262676	3	0.0610448
experiment 9	T2	5x10^4	4	88228	87678	76860.3						-0.0589117	0.312667	0.114092						0.122616	0.185936	0.377163	3	0.0876512	0.0619278	0.319919	0.074348
experiment 9	T3	10x10^4	0	552360	559548	507623
experiment 9	T3	10x10^4	1	213713	219653	246716						-0.949568	-0.935078	-0.721502
experiment 9	T3	10x10^4	3	412574	369634	534245						0.328892	0.260231	0.386309						0.325144	0.0631225	0.128041	3	0.0297563
experiment 9	T3	10x10^4	4	473886	478984	588847						0.138552	0.259154	0.0973112						0.165006	0.0841019	0.170597	3	0.039646	0.245075	0.149319	0.0347011
experiment 9	T4	20x10^4	0	942529	1.01224e+06	969078
experiment 9	T4	20x10^4	1	733107	773884	687269						-0.251276	-0.268498	-0.343619
experiment 9	T4	20x10^4	3	1.55107e+06	1.69518e+06	1.47377e+06						0.374704	0.392062	0.381426						0.38273	0.00875211	0.0177533	3	0.00412578
experiment 9	T4	20x10^4	4	1.88418e+06	1.93273e+06	1.70728e+06						0.194548	0.131144	0.147081						0.157591	0.032983	0.0669045	3	0.0155483	0.270161	0.0423289	0.00983707
standardized TC without grazing			1	209940	203564	226781	228416	222040	203564	265859	230706
standardized TC without grazing			4	823411	879003	938192	883418	874098	979068	976942	990186	0.455544	0.487603	0.473323	0.450876	0.456779	0.523541	0.43382	0.485584	0.470884	0.0160613	0.0218894	8	0.00925557	0.470884	0.0218894	0.00925557
standardized TC without grazing			5	1890445	1938679	1953231	1858071	1890281	2019614	1874748	2154505	0.831112	0.790974	0.733286	0.743496	0.771289	0.724061	0.651802	0.777423	0.75293	0.0491746	0.041841	8	0.0176918	0.611907	0.0318652	0.0134737
standardized TC without grazing			6	1996233	2262582	2211896	2316048	2218926	2129162	2357252	2420365	0.0544497	0.1545	0.124365	0.220323	0.160298	0.0528221	0.229022	0.116357	0.139017	0.0513263	0.0518092	8	0.0219066
standardized TC without grazing			7	3058034	3066863	3000644	3084358	2980860	3087955	3102671	3267647	0.42651	0.304149	0.304977	0.286481	0.295189	0.371781	0.274767	0.300152				8	0.0170842
standardized TC without grazing			8	3524023	3586482	3883407	3929843	4002112	4204041	4442267	4546093	0.141831	0.156517	0.257886	0.242256	0.29461	0.308537	0.358901	0.330198				8	0.025993
